# Supplementary material for: Comparison of open-skill and closed-skill exercises in improving the response inhibitory ability of the elderly: a protocol for a randomised controlled clinical trial
Source: PubMed Central journal article supplement — BMJ Open. 2021 Nov 23;11(11):e051966. doi: 10.1136/bmjopen-2021-051966 (PMC8611442; doi:10.1136/bmjopen-2021-051966), 2021-11-23
Supplement: bmjopen-2021-051966.draft_revisions.pdf [file bmjopen-2021-051966.draft_revisions.pdf]

# BMJ Open

BMJ Open is committed to open peer review. As part of this commitment we make the peer review history of every article we publish publicly available.

When an article is published we post the peer reviewers' comments and the authors' responses online. We also post the versions of the paper that were used during peer review. These are the versions that the peer review comments apply to.

The versions of the paper that follow are the versions that were submitted during the peer review process. They are not the versions of record or the final published versions. They should not be cited or distributed as the published version of this manuscript.

BMJ Open is an open access journal and the full, final, typeset and author-corrected version of record of the manuscript is available on our site with no access controls, subscription charges or pay-per-view fees (<http://bmjopen.bmj.com>).

If you have any questions on BMJ Open's open peer review process please email [info.bmjopen@bmj.com](mailto:info.bmjopen@bmj.com)

# BMJ Open

## Comparison of open- and closed-chain exercises in improving the inhibitory control ability of the elderly: a protocol for a randomized controlled clinical trial

|                               |                                                                                                                                                                                                                                                                                     |
|-------------------------------|-------------------------------------------------------------------------------------------------------------------------------------------------------------------------------------------------------------------------------------------------------------------------------------|
| Journal:                      | <i>BMJ Open</i>                                                                                                                                                                                                                                                                     |
| Manuscript ID                 | bmjopen-2021-051966                                                                                                                                                                                                                                                                 |
| Article Type:                 | Protocol                                                                                                                                                                                                                                                                            |
| Date Submitted by the Author: | 03-Apr-2021                                                                                                                                                                                                                                                                         |
| Complete List of Authors:     | ke, liu; Shanghai Punan Hospital of Pudong New District<br>lanlan, zhang; Guangzhou Sport University, School of Leisure Sport and Management<br>jian, zhang; Shanghai University of Sport, School of Psychology<br>jianing, wei; Shanghai University of Sport, School of Psychology |
| Keywords:                     | Old age psychiatry < PSYCHIATRY, MENTAL HEALTH, Biophysics < NATURAL SCIENCE DISCIPLINES, PUBLIC HEALTH                                                                                                                                                                             |
|                               |                                                                                                                                                                                                                                                                                     |

SCHOLARONE™  
Manuscripts

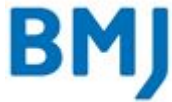

I, the Submitting Author has the right to grant and does grant on behalf of all authors of the Work (as defined in the below author licence), an exclusive licence and/or a non-exclusive licence for contributions from authors who are: i) UK Crown employees; ii) where BMJ has agreed a CC-BY licence shall apply, and/or iii) in accordance with the terms applicable for US Federal Government officers or employees acting as part of their official duties; on a worldwide, perpetual, irrevocable, royalty-free basis to BMJ Publishing Group Ltd ("BMJ") its licensees and where the relevant Journal is co-owned by BMJ to the co-owners of the Journal, to publish the Work in this journal and any other BMJ products and to exploit all rights, as set out in our [licence](#).

The Submitting Author accepts and understands that any supply made under these terms is made by BMJ to the Submitting Author unless you are acting as an employee on behalf of your employer or a postgraduate student of an affiliated institution which is paying any applicable article publishing charge ("APC") for Open Access articles. Where the Submitting Author wishes to make the Work available on an Open Access basis (and intends to pay the relevant APC), the terms of reuse of such Open Access shall be governed by a Creative Commons licence – details of these licences and which [Creative Commons](#) licence will apply to this Work are set out in our licence referred to above.

Other than as permitted in any relevant BMJ Author's Self Archiving Policies, I confirm this Work has not been accepted for publication elsewhere, is not being considered for publication elsewhere and does not duplicate material already published. I confirm all authors consent to publication of this Work and authorise the granting of this licence.

1  
2  
3  
4 **Title:** Comparison of open- and closed-chain exercises in improving the inhibitory  
5  
6 control ability of the elderly: a protocol for a randomized controlled clinical  
7  
8 trial  
9  
10

11 **Article Type:** Clinical Study Protocol  
12

13  
14 **Keywords:** Elder; Open-chain exercise; Closed-chain exercise; Inhibitory control  
15  
16 ability; Study protocol  
17  
18

19 **Corresponding Author:** Jia-Ning Wei  
20

21  
22 **Corresponding Author's Institution:** Shanghai University of Sport  
23

24  
25 **First Author:** Ke Liu, Lan-Lan Zhang  
26

27 **Order of Authors:** Jian Zhang  
28

## 29 **Abstract**

30  
31  
32 **Introduction** As people age, they are more likely to experience a decline in their  
33  
34 response inhibition ability, which interferes with daily life. Previous studies have  
35  
36 shown that exercise intervention can improve the cognitive ability of the elderly, but  
37  
38 research on open- and closed-chain exercises to improve the response inhibition in  
39  
40 this age group is still limited. This study will explore the advantages of long-term  
41  
42 intervention of table tennis (open-chain exercise) compared with fit aerobics  
43  
44 (closed-chain exercise) on the inhibitory control ability of the elderly.  
45  
46  
47  
48  
49

50  
51 **Methods and analysis** A single-blind randomized controlled trial will be conducted.  
52  
53 A total of 90 elderly subjects will be recruited and allocated randomly to the  
54  
55 following groups: table tennis, fit aerobics, and control. The interventions for the table  
56  
57 tennis group and the fit aerobics group will be implemented in three 60-min sessions  
58  
59  
60

1  
2  
3  
4 per week for 6 months; the control group will receive no exercise intervention. The  
5  
6 primary assessment will be behavioral indicators of inhibitory control ability in the  
7  
8 elderly based on the stop signal task (SST). The secondary outcomes will include  
9  
10 cognitive ability, mental status, and depression in the elderly. Assessments will be  
11  
12 conducted at baseline, 3 months, 6 months, and 12 months.  
13  
14  
15

16  
17 **Ethics and dissemination** This study was approved by the Shanghai University of  
18  
19 Sport Research Ethics Committee (102772019RT012) and will provide reference for  
20  
21 the advantages of table tennis compared with other types of sports in improving the  
22  
23 inhibitory control ability of the elderly. The results of this study will provide a  
24  
25 theoretical basis for choosing the best exercise program to improve the inhibitory  
26  
27 control ability of the elderly.  
28  
29  
30  
31

32  
33 **Trial registration number** This study has been registered prospectively in the  
34  
35 Chinese Clinical Trial Registry (ChiCTR2100043616, 23 February 2021).  
36  
37  
38  
39  
40  
41  
42  
43  
44  
45  
46  
47  
48  
49  
50  
51  
52  
53  
54  
55  
56  
57  
58  
59  
60

1  
2  
3  
4 Cover letter  
5  
6  
7  
8

9 Editor-in-Chief  
10

11 BMJ Open  
12

13  
14 April 3, 2021  
15  
16  
17

18  
19 Dear editor,  
20

21  
22 We would like to submit our manuscript entitled “ **Comparison of open- and**  
23 **closed-chain exercises in improving the inhibitory control ability of the elderly: a**  
24 **protocol for a randomized controlled clinical trial**” for publication as a *protocol*  
25 in BMJ Open.  
26  
27  
28  
29  
30  
31

32 This study will be conducted in a single-blind randomized controlled trial, a  
33 six-month open- and closed-chain exercises intervention will be used to study the  
34 effects of long-term on the inhibitory control ability in elderly. The study is scheduled  
35 to begin in August 2021. This study will use the stop signal task (SST) to explore how  
36 different types of exercise experience affect the response inhibition ability in the  
37 elderly. We will also explore whether sports involving open-chain exercises can  
38 improve the cognitive level, depression state, and mental state of the elderly while  
39 improving their inhibition and control ability.  
40  
41  
42  
43  
44  
45  
46  
47  
48  
49  
50  
51

52  
53 Through multi-dimensional measurements of the participants, we hope to provide a  
54 more sufficient theoretical basis for the mechanism of improving the inhibition and  
55 control ability of the elderly through exercise.  
56  
57  
58  
59  
60

1  
2  
3  
4 We confirm that this manuscript has not been published elsewhere and is not under  
5  
6 consideration by another journal. All authors have approved the manuscript and agree  
7  
8 with submission to BMJ Open. The study was supported by a grant from the National  
9  
10 Natural Science Foundation of China( 3197070657) . The authors have no conflicts of  
11  
12 interest to declare.  
13  
14  
15  
16  
17  
18

19 Please address all correspondence to:

20  
21  
22 Jia-Ning Wei

23  
24 School of Psychology

25  
26  
27 Shanghai University of Sport

28  
29  
30 650 Qing Yuan Huan Road, Shanghai, China, 200438

31  
32 Tel.: +8613524749688

33  
34 E-mail: [2011916006@sus.edu.cn](mailto:2011916006@sus.edu.cn)  
35  
36  
37  
38

39 We look forward to hearing from you at your earliest convenience.  
40  
41  
42  
43  
44  
45  
46  
47  
48  
49  
50  
51

52 Yours sincerely,

53  
54 Jia-Ning Wei, Comparison of open- and closed-chain exercises in improving the  
55  
56 inhibitory control ability of the elderly: a protocol for a randomized controlled clinical  
57  
58 trial  
59  
60

1  
2  
3  
4 **Title:** Comparison of open- and closed-chain exercises in improving the inhibitory  
5  
6 control ability of the elderly: a protocol for a randomized controlled clinical trial  
7  
8  
9

10  
11  
12 **Type of Manuscript:** Clinical Study Protocol  
13

14 **Authors:** Ke Liu<sup>1†</sup>, Lan-Lan Zhang<sup>2†</sup>, Jian Zhang<sup>3</sup>, Jia-Ning Wei<sup>3\*</sup>  
15  
16

17  
18  
19 **Affiliation:**  
20

21  
22 <sup>1</sup> Shanghai Punan Hospital of Pudong New District, Shanghai, China  
23

24 <sup>2</sup> School of Leisure Sport and Management, Guangzhou Sport University,  
25  
26 Guangzhou, China  
27

28  
29 <sup>3</sup> School of Psychology, Shanghai University of Sport, Shanghai, China  
30

31  
32 † These authors contributed equally to this work.  
33  
34

35  
36  
37 **Figures and tables:** 3 figures and 2 tables  
38

39  
40 **Number of Words:** Abstract: 264 words; Manuscript: 3,218 words; 24 pages  
41  
42

43  
44  
45 **\* Corresponding author:**  
46

47  
48 Jia-Ning Wei  
49

50  
51 School of Psychology  
52

53  
54 Shanghai University of Sport  
55

56  
57 650 Qing Yuan Huan Road, Shanghai, China, 200438  
58

59  
60 E-mail: [2011916006@sus.edu.cn](mailto:2011916006@sus.edu.cn)



1  
2  
3  
4 **Abbreviations**  
5

6 SST, Stop signal task  
7

8  
9 SSRT, stop signal response time  
10

11 SSD, stop signal delay  
12

13  
14 MoCA, Montreal Cognitive Assessment  
15

16  
17 BDI-II, Beck Depression Inventory (2nd edition);  
18

19 MMSE, Mini Mental State Examination  
20  
21  
22  
23  
24  
25  
26  
27  
28  
29  
30  
31  
32  
33  
34  
35  
36  
37  
38  
39  
40  
41  
42  
43  
44  
45  
46  
47  
48  
49  
50  
51  
52  
53  
54  
55  
56  
57  
58  
59  
60

1  
2  
3  
4 Comparison of open- and closed-chain exercises in improving the  
5  
6 inhibitory control ability of the elderly: a protocol for a randomized  
7  
8 controlled clinical trial  
9  
10  
11  
12  
13

14 **Abstract**

15  
16  
17 **Introduction** As people age, they are more likely to experience a decline in their  
18  
19 response inhibition ability, which interferes with daily life. Previous studies have  
20  
21 shown that exercise intervention can improve the cognitive ability of the elderly, but  
22  
23 research on open- and closed-chain exercises to improve the response inhibition in  
24  
25 this age group is still limited. This study will explore the advantages of long-term  
26  
27 intervention of table tennis (open-chain exercise) compared with fit aerobics  
28  
29 (closed-chain exercise) on the inhibitory control ability of the elderly.  
30  
31  
32  
33

34  
35 **Methods and analysis** A single-blind randomized controlled trial will be conducted.  
36  
37 A total of 90 elderly subjects will be recruited and allocated randomly to the  
38  
39 following groups: table tennis, fit aerobics, and control. The interventions for the table  
40  
41 tennis group and the fit aerobics group will be implemented in three 60-min sessions  
42  
43 per week for 6 months; the control group will receive no exercise intervention. The  
44  
45 primary assessment will be behavioral indicators of inhibitory control ability in the  
46  
47 elderly based on the stop signal task (SST). The secondary outcomes will include  
48  
49 cognitive ability, mental status, and depression in the elderly. Assessments will be  
50  
51 conducted at baseline, 3 months, 6 months, and 12 months.  
52  
53  
54  
55  
56  
57

58 **Ethics and dissemination** This study was approved by the Shanghai University of  
59  
60

1  
2  
3  
4 Sport Research Ethics Committee (102772019RT012) and will provide reference for  
5  
6 the advantages of table tennis compared with other types of sports in improving the  
7  
8 inhibitory control ability of the elderly. The results of this study will provide a  
9  
10 theoretical basis for choosing the best exercise program to improve the inhibitory  
11  
12 control ability of the elderly.  
13  
14  
15

16  
17 **Trial registration number** This study has been registered prospectively in the  
18  
19 Chinese Clinical Trial Registry (ChiCTR2100043616, 23 February 2021).  
20  
21

### 22 **Strengths and limitations of this study**

- 23  
24  
25 1. The results of this study will provide a choosing the best exercise program to  
26  
27 improve the inhibitory control ability of the elderly.  
28  
29  
30 2. The patients will come from one geographic area which limits the generalisability.  
31  
32  
33  
34

### 35 **Introduction**

36  
37 Response inhibition ability is a type of cognitive control ability that can achieve  
38  
39 behavioral goals by adjusting perception and motor function in the changing  
40  
41 environment as well as be used to solve conflicts. As people age, they are likely to  
42  
43 experience a decline in their response inhibition ability,<sup>[1-4]</sup> which can interfere with  
44  
45 daily life and even the ability to live independently. Although some studies have  
46  
47 shown that exercise intervention can improve the cognitive ability of the elderly, there  
48  
49 are few studies on the effect of exercise intervention on reactive inhibition ability. In  
50  
51 particular, research on the different types of exercise to improve the response  
52  
53 inhibition ability of the elderly is still limited.  
54  
55  
56  
57  
58  
59  
60

1  
2  
3  
4 Sports can be divided into closed kinetic chain activities and open kinetic  
5  
6 chain activities.<sup>[5]</sup> The operating environment of closed-chain exercises, such as fit  
7  
8 aerobics, fitness running, etc., is stable; and the operating state is determined by the  
9  
10 operator. In contrast, the operating environment of open-chain exercises, including  
11  
12 those involved in the sports of table tennis, basketball, etc., is unstable; and the  
13  
14 operation state is determined by external conditions, such as a ball and opponents. In  
15  
16 open-chain exercises, the participant must continuously adjust their behavior to  
17  
18 unpredictable stimuli and must invest more cognitive resources in the  
19  
20 decision-making process. It has been demonstrated that intervention with long-term  
21  
22 open-chain exercise can improve cognitive function better than closed-chain exercise,  
23  
24 but whether it can improve inhibitory control ability better is not clear.  
25  
26  
27  
28  
29  
30  
31

32 As one of the classical paradigms to test response inhibition, the stop signal  
33  
34 task (SST) tests the complete suppression of an ongoing action. The SST instructs the  
35  
36 participant to perform a response when the go signal appears, but after a few go  
37  
38 signals appear, a stop signal will appear at a specific time interval, and the individual  
39  
40 will be asked to stop the response as far as possible.<sup>[6]</sup> The strengths of this test are  
41  
42 that a stop signal to evoke controlling behavior is administered after a go signal is  
43  
44 used, and the interval between these two signals dynamically changes regularly.<sup>[7]</sup> In  
45  
46 addition, the SST is capable of quantizing inhibitory control behavior. However, no  
47  
48 response occurs when the participant holds up successfully. The stop signal response  
49  
50 time (SSRT) is a more sensitive indicator to evaluate the inhibitory control ability.<sup>[8]</sup>  
51  
52  
53  
54  
55  
56  
57  
58 In short, to calculate the SSRT, all go-reactions (i.e., go-trials in which the response  
59  
60

1  
2  
3  
4 was missed) are rank-ordered and assigned the maximum response time in order to  
5  
6 compensate for the lacking response. Afterwards, the most recent stop signal delay  
7  
8 (SSD) is subtracted from the response time corresponding to the stop-signal response  
9  
10 percentile. The resulting value is termed the SSRT.<sup>[9,10]</sup> These results can be used as  
11  
12 an important index to evaluate the inhibitory control ability.  
13  
14  
15

16  
17 The proposed randomized clinical trial will examine the effects of table tennis  
18  
19 (open-chain exercise) and fit aerobics (closed-chain exercise) on the primary outcome  
20  
21 (behavioral task) of inhibitory control ability as well as on the secondary outcomes of  
22  
23 cognitive ability, mental status, and depression in the elderly. We hypothesized that  
24  
25 different types of exercise intervention can affect the inhibitory control ability to  
26  
27 varying degrees and that the effect of open-chain exercises is better.  
28  
29  
30  
31  
32  
33  
34

## 35 **Methods**

### 36 **Study design**

37  
38 This study protocol of a pilot study is designed as a prospective, single-blind  
39  
40 randomized controlled trial. Eligible participants will be randomized into table tennis,  
41  
42 fit aerobics, or control groups at a 1:1:1 ratio. The duration of exercise intervention  
43  
44 will be 6 months. The cognitive function test (questionnaire and behavioral task) will  
45  
46 be conducted before the intervention as well as at 3 months, 6 months, and 12 months  
47  
48 after the intervention. Participants who meet the criteria will undergo baseline  
49  
50 assessments. All evaluations will be done at baseline and immediately after the  
51  
52 exercise intervention (See Figure 1). We will recruit healthy right-handed elderly  
53  
54  
55  
56  
57  
58  
59  
60

1  
2  
3  
4 participants with normal or corrected-to-normal vision and without a history of  
5  
6 neurological diseases in the same way.  
7  
8  
9

## 10 11 **Ethics and dissemination**

12  
13  
14 All participants who meet the inclusion and exclusion criteria will be required to sign  
15  
16 an informed consent form prior to enrolling in the study. This study was approved by  
17  
18 the Shanghai University of Sport Research Ethics Committee (102772019RT012).  
19  
20  
21  
22  
23  
24

25 Figure 1 Flow diagram of the study design

## 26 27 **Participants**

28  
29  
30 Any participants with chronic cardiovascular or neurological diseases will be  
31  
32 excluded. In addition, those with a regular exercise routine will be excluded. All  
33  
34 participants will be between the ages of 60 and 70 years old and right-handed as  
35  
36 assessed by the Edinburgh Handedness Inventory. Moreover, they must have normal  
37  
38 or corrected-to-normal vision and no signs of depression or cognitive impairment as  
39  
40 detected by the Beck Depression Inventory, 2nd edition (BDI-II) and the Mini Mental  
41  
42 State Examination (MMSE).  
43  
44  
45  
46  
47

48 Before and after the intervention, all groups will have their demographics  
49  
50 statistically analyzed for factors such as health status, physical fitness, and cognitive  
51  
52 function (Table 1). Intergroup differences will be minimized before the intervention.  
53  
54  
55  
56  
57

58 Table 1 Demographic and clinical characteristics of the study participants  
59  
60

|                                                    | Open group | Closed group | Control |
|----------------------------------------------------|------------|--------------|---------|
| Age                                                |            |              |         |
| Gender (male:female)                               |            |              |         |
| Hight                                              |            |              |         |
| Body mass index (kg/m <sup>2</sup> )               |            |              |         |
| HRmax                                              |            |              |         |
| Score for self-reported habitual physical activity |            |              |         |
| MoCA                                               |            |              |         |
| BDI-II                                             |            |              |         |
| MMSE                                               |            |              |         |
| Behavioral tests for cognitive ability (RT)        |            |              |         |
| Behavioral test about cognitive ability (ACC)      |            |              |         |

MoCA, Montreal Cognitive Assessment; BDI-II, Beck Depression Inventory (2nd edition); MMSE, Mini Mental State Examination; Behavioral tests for cognitive ability: Stroop task testing, n-back task testing, task-switch task testing; RT, response time; ACC, accuracy.

## Sample size

From our previous studies on the modulation of SST performance,<sup>[11,12]</sup> we expected an effect of  $r = 0.4$ . Together with an  $\alpha$ -value of 0.05 and a power of  $1 - \beta = 0.9$ , a sample of at least 72 participants (24/group) was planned to find a similar effect. Calculations were carried out using G\*Power, version 3.1,<sup>[13]</sup> with anticipation of a 20% attrition rate. Therefore, we plan to recruit 90 subjects (30/group).

## Evaluation Procedures

### Exercise intervention

The exercise intervention will last for 6 months. The participants will be divided into three groups: table tennis, fit aerobics, and control. The table tennis (open-chain) and fit aerobics (closed-chain) groups will train for 60 min, three times a week. The exercise intensity will be monitored, ensuring that the heart rate remains in the range of 60–70% of the maximum heart rate ( $HR_{MAX} = 220 - \text{age}$ ). During the training period, the exercise intensity will be monitored by the experimenter through real-time heart rate monitoring and the subject's subjective reaction. The exercise load and heart rate responses of the subjects will be recorded at each training session and adjusted accordingly with an increase of aerobic capacity. The entire intervention process will be monitored in real time by health care professionals.

### *Table tennis group*

Each session will consist of a warm-up for 10 min, table tennis practice under the guidance of a coach for 40 min, and relaxation for 10 min. The degree of difficulty of training throughout the program will be gradually increased. The training will consist of the following seven main parts: (1) footwork; (2) the serve; (3) forehand backhand attack; (4) forehand backhand loop; (5) kill shot; (6) continuous hitting of directional



1  
2  
3  
4 or nondirectional balls randomly sent by the server; and (7) comprehensive practice.  
5

6 All the technical movements will be from simple to complex.  
7  
8  
9

### 10 11 12 13 14 ***Fit aerobics group*** 15

16  
17 The participants in the closed-chain exercise group will attend a supervised fit  
18 aerobics class of the same frequency, duration, and length as the open-chain exercise  
19 group. Fit aerobics at 50–60% of the heart rate reserve for the first two weeks,  
20 followed by 70–75% of the heart rate reserve. Each fit aerobics class will consist of  
21 warm-up activities for 10 min, basic aerobics activities for 30 min, strength exercises  
22 or mat exercises for 10 min, and relaxation and stretching for 10 min. The fit aerobics  
23 training will involve the following: 1) jogging, rope skipping, and/or gymnastics to  
24 warm up and achieve a slightly sweating body, and the heart rate will be slightly  
25 faster; 2) stepping, side parallel step, side cross step, jumping jacks, lunging, kicking,  
26 and so on. Following the rhythm of the music, each action will be reduced from four  
27 sets to two sets and then to one set; 3) upper body exercises, lower body exercises,  
28 core strength exercises, or yoga exercises related to them; 4) relax the shoulder, elbow,  
29 hip, and knee joints by doing a few stretches to help relax the muscles.  
30  
31  
32  
33  
34  
35  
36  
37  
38  
39  
40  
41  
42  
43  
44  
45  
46  
47  
48  
49  
50  
51  
52  
53  
54  
55

### 56 ***Control group*** 57 58 59 60

1  
2  
3  
4 For the control group, health testing, cognitive ability testing, and telephone or  
5  
6 personal interviews will be carried out in addition to regular physical and mental  
7  
8 health education lectures.  
9

### 10 11 12 13 14 15 *SST protocol*

16  
17  
18  
19 The SST was programmed using E-prime 2, in which the subjects will be asked to  
20  
21 press a "←" button or a "→" button according to the left and right arrow directions. In  
22  
23 25% of the trials, the arrow will turn red and a gray triangle will appear; the  
24  
25 participants will press the button to stop or give no response. The interval of  
26  
27 stimulation will be dynamically adjusted according to the tracking procedure. The  
28  
29 task will be divided into four groups of 120 trials each. The task flow is shown in  
30  
31 Figure 2. The execution go signal reaction time (GoRT), stop response reaction time  
32  
33 (SRRT), SSD, and SSRT will be investigated.  
34  
35  
36  
37  
38  
39  
40  
41  
42  
43  
44

45  
46  
47  
48  
49  
50  
51  
52  
53  
54  
55  
56  
57  
58  
59  
60  
  
Figure 2 Stop signal task flow chart

The instructions for the experiment will be follows: Welcome to the  
experiment. First, "+" will appear in the center of the screen to alert the user to begin  
the keystroke reaction, and the right index finger should be placed on the "↓" to  
prepare for the experiment. When the black arrow appears in the center of the screen,  
use your right index finger to press the button. When the left arrow appears, use your

1  
2  
3  
4 index finger to press the "←" key on the keyboard. When the right arrow appears, use  
5  
6 your index finger to press the "→" key on the keyboard. After each key response, the  
7  
8 right index finger should quickly return to the "↓" key to wait for the next response.  
9  
10  
11 When the black arrow in the center of the screen turns red and a small gray triangle  
12  
13 appears, please stop the keystroke reaction immediately. When the red arrow appears  
14  
15 in the center of the screen, please do not perform any keystroke reaction. Let's move  
16  
17  
18 on to practice.  
19  
20  
21  
22  
23  
24  
25

## 26 **Outcomes**

### 27 **Primary outcome**

#### 28 *Behavioral task*

29  
30  
31 The task will include randomly interspersed no-go and stop-signal trials, which will  
32  
33 enable us to examine both types of inhibition. A total of 480 trials will be performed,  
34  
35 including 75% go trials and 25% stop trials. On go trials, the subjects will respond to  
36  
37 a left/right black arrow (1000 ms) by pressing the buttons with their right hand.  
38  
39 Responses will be made with the index finger (for the left or right arrow). In the  
40  
41 stop-signal trials, a response will be initially cued by a left/right black arrow, but the  
42  
43 arrow color will change to red concurrent with a gray triangle after a SSD, and the  
44  
45 subjects will be asked not to respond. The SSD will be varied from trial to trial by  
46  
47 using a step-up/down algorithm with an initial estimate of 250 ms to maintain 50%  
48  
49 successful inhibition. The task flow chart is shown in Figure 3.  
50  
51  
52  
53  
54  
55  
56  
57  
58  
59  
60

### Figure 3 Stop behavioral task

The task will consist of randomly interspersed no-go and stop-signal trials. A total of 480 trials will be performed (75% go, 25% stop).

### Secondary outcomes

Secondary outcome measures will include the following: (1) Montreal Cognitive Assessment (MoCA); (2) BDI-II; (3) MMSE; (4) Stroop task testing; (5) n-back task testing; and (6) task-switch task testing (Table 2). The process of inhibitory control is the process of inhibition, refresh, and switching of the response task through cognitive function, so we will test the abilities of inhibition, refresh, and switching in the cognitive process of the elderly with different exercise types before and after the intervention by the Stroop task, the n-back task, and the task-switch task to compare their inhibitory control ability. The details of each outcome and instrument will be compiled as in Table 2.

Table 2 The differences among the three groups of subjects at various stages

| Group  | Baseline | 6 months | 12 months | 18 months | 24 months | F (P        | F (P         | F (P value)        |
|--------|----------|----------|-----------|-----------|-----------|-------------|--------------|--------------------|
|        |          |          |           |           |           | value)      | value)       | Interaction effect |
| Open   |          |          |           |           |           | Time effect | Group effect |                    |
| MoCA   |          |          |           |           |           |             |              |                    |
| Closed |          |          |           |           |           |             |              |                    |

---

|        |         |
|--------|---------|
|        | Control |
|        | Open    |
| BDI-II | Closed  |
|        | Control |
|        | Open    |
| MMSE   | Closed  |
|        | Control |
|        | Open    |
| Stroop | Closed  |
| (RT)   | Control |
|        | Open    |
| n-back | Closed  |
| (ACC)  | Control |
| Task-  | Open    |
| switch | Closed  |
| (ACC)  | Control |

---

MoCA, Montreal Cognitive Assessment; BDI-II, Beck Depression Inventory (2nd edition); MMSE, Mini Mental

State Examination; RT, response time; ACC, accuracy.

### *MoCA*

The MoCA is an assessment tool for the rapid screening of cognitive dysfunction. It includes 11 items in 8 cognitive domains: attention and concentration, executive

1  
2  
3  
4 function, memory, language, abstract thinking, and computation. The highest possible  
5  
6 total score is 30, and a score of 26 or more is normal. It has a high sensitivity and a  
7  
8 short test time, so it is suitable for clinical application.  
9  
10

### 11 12 13 14 *BDI-II*

15  
16 The BDI-II contains 21 topics, which are suitable for people older than 13 years old.  
17  
18 The areas of focus include symptoms of depression, such as despair, sensitivity, ways  
19  
20 of understanding things, and physical characteristics, such as fatigue, weight loss, and  
21  
22 decreased sexual ability.  
23  
24  
25  
26  
27  
28  
29

### 30 31 *MMSE*

32 The MMSE scale includes the following seven aspects: time orientation, place  
33  
34 orientation, immediate memory, attention and calculation, delayed memory, language,  
35  
36 and visual space. There are a total of 30 questions asked in the exam, with 1 point  
37  
38 awarded for each correct answer, and 0 points given for each wrong answer or  
39  
40 unanswered question. The total score range of the scale is 0–30 points. The test scores  
41  
42 are closely related to the educational level of the subject. The normal cut-off values  
43  
44 are as follows: illiterate subjects, >17; primary school education only, >20; junior  
45  
46 high school education and above, >24.  
47  
48  
49  
50  
51  
52  
53  
54  
55

### 56 57 *Stroop task*

58 After a period of exercise intervention, comparison of the Stroop task response time  
59  
60

1  
2  
3  
4 between the open-chain, closed-chain, and control groups will be used to explore  
5  
6 which types of exercise can improve cognitive inhibition ability.  
7  
8  
9

### 10 11 *N-back task*

12  
13  
14 By comparing the n-back task accuracy of the elderly in the three groups, the  
15  
16 improvement of the cognitive refresh ability of each group will be compared under  
17  
18 different cognitive loads.  
19  
20  
21

### 22 23 24 *Task-switch task*

25  
26  
27 By comparing the task-switch accuracy of the three groups under different stimulus  
28  
29 conditions, we will determine which type of exercise can improve the cognitive  
30  
31 transformation ability most significantly.  
32  
33  
34

## 35 36 37 **Patient and public involvement**

38  
39  
40 Participants have not been involved in the study recruitment. The authors conceived  
41  
42 the initial research questions and outcome measures, and modified according to the  
43  
44 telephone interviews with patients and their guardians by a research assistant. In order  
45  
46 to assure the safety and feasibility of the intervention, we invited six elderly peoples  
47  
48 to learn and practise the table tennis and fit aerobics exercise before designing the  
49  
50 RCT. Table tennis and fit aerobics exercise were revised based on the exercise  
51  
52 performance and feedback provided by the participants. The burden of the  
53  
54 intervention will be assessed by patients and their advisors through face-to-face  
55  
56  
57  
58  
59  
60

1  
2  
3  
4 interviews before signing informed consent. The findings of the study will be  
5  
6 disseminated to the participants and their guardians.  
7  
8  
9

## 10 11 **Statistical analysis**

12  
13  
14 Repeated-measures analysis of variance will be used to determine the effects of  
15  
16 different types of exercise (open, closed, or control) on the primary outcomes (GoRT,  
17  
18 SRRT, SSD, and SSRT) as well as on the secondary outcomes (MOCA score, BDI-II  
19  
20 score, MMSE score, Stroop response time, n-back accuracy, task-switch accuracy),  
21  
22 with group and time serving as factors.  
23  
24  
25  
26  
27  
28  
29

## 30 31 **Discussion**

32  
33 Previous studies have shown that open-chain exercises require more regulating  
34  
35 capacity than closed-chain exercises.<sup>[14]</sup> First, a study comparing the cognitive control  
36  
37 of sports involving open-chain exercises with that of closed-chain exercises has  
38  
39 revealed that athletes engaging in open-chain exercises have an advantage in  
40  
41 cognitive control.<sup>[15]</sup> Then some researchers found that athletes participating in  
42  
43 open-chain exercises have a faster switching speed, fewer cognitive resources, and a  
44  
45 higher efficiency in the inhibition process.<sup>[16]</sup> At the same time, another study has  
46  
47 demonstrated that athletes who engage in open-chain exercises have a stronger  
48  
49 reaction switching capability.<sup>[17]</sup> Based on this evidence, participating in sports  
50  
51 involving open-chain exercises can improve the ability of inhibition, refresh, and  
52  
53 conversion in the inhibitory control process. Therefore, in this study, the Stroop task,  
54  
55  
56  
57  
58  
59  
60



1  
2  
3  
4 n-back task, and task-switch task were selected as secondary outcomes to investigate  
5  
6 the inhibition, refresh, and transformation abilities, respectively, of the participants.  
7  
8  
9 Determining the effect of long-term intervention of different types of sports on the  
10  
11 inhibitory control ability of the elderly will improve our understanding of inhibitory  
12  
13 control degradation and support the development of diversified training programs.  
14  
15  
16

17 This study will use the SST to explore how different types of exercise  
18  
19 experience affect the response inhibition ability in the elderly. Because of the  
20  
21 interactions of the cognitive level, depressive state, and mental state with the  
22  
23 inhibitory control ability, we will perform multiple MoCA, BDI-II, MMSE  
24  
25 measurements before and after each intervention. We will also explore whether sports  
26  
27 involving open-chain exercises can improve the cognitive level, depression state, and  
28  
29 mental state of the elderly while improving their inhibition and control ability.  
30  
31 Through multi-dimensional measurements of the participants, we hope to provide a  
32  
33 more sufficient theoretical basis for the mechanism of improving the inhibition and  
34  
35 control ability of the elderly through exercise.  
36  
37  
38  
39  
40  
41  
42

43 This study will have several limitations. The effect of long-term exercise  
44  
45 intervention on cognitive control is greatly influenced by the screening and control of  
46  
47 subjects. How to select and control participants in a longitudinal study is one of the  
48  
49 difficulties of this project. In this research, the screening principles of the subjects will  
50  
51 be determined in the longitudinal study, and the inclusion criteria and exclusion  
52  
53 criteria will be strictly defined, especially the experimental groups and the control  
54  
55 group in terms of age, physical level, intervention time, and intensity. In addition,  
56  
57  
58  
59  
60

1  
2  
3  
4 because the exercise that will serve as an intervention will be widely known to the  
5  
6 participants, the single-blind design may expose the study to risks of bias stemming  
7  
8 from performance and evaluation, which may potentially lead to overestimation of the  
9  
10 effects of exercise.  
11  
12  
13  
14  
15  
16

17 Funding: This study was supported by grants from the National Natural  
18  
19 Science Foundation of China (3197070657) .  
20  
21  
22  
23  
24

### 25 **Contributorship statement**

26  
27 Ke Liu: Conceptualization, Methodology, SoftwarePriya. Lanlan Zhang:Writing-  
28  
29 Reviewing and Editing. Jian Zhang: Visualization, Investigation. Jia-Ning Wei: Data  
30  
31 curation, Writing- Original draft preparation.  
32  
33  
34  
35  
36  
37

### 38 **References**

- 
- 39  
40  
41 [1] Darowski Emily S, et al."Age-related differences in cognition: the role of distraction control.." *Neuropsychology* 22.5(2008):. doi:10.1037/0894-4105.22.5.638.  
42  
43 [2] Chen T Y,et al."Cognitive Aging and Executive Decline Hypothesis." *Advances in Psychological*  
44  
45 *Science* .05(2004):729-736. doi:CNKI:SUN:XLXD.0.2004-05-011.  
46  
47 [3] Fergus I.M. Craik, ,and Ellen Bialystok."Cognition through the lifespan: mechanisms of change." *Trends in*  
48  
49 *Cognitive Sciences* 10.3(2006):. doi:10.1016/j.tics.2006.01.007.  
50  
51 [4]Timothy A. Salthouse."Aging and measures of processing speed." *Biological Psychology* 54.1(2000):.  
52  
53 doi:10.1016/S0301-0511(00)00052-1.  
54  
55 [5] Voss Michelle W., et al."Plasticity of Brain Networks in a Randomized Intervention Trial of Exercise Training  
56  
57 in Older Adults." *Frontiers in Aging Neuroscience* .(2010):. doi:10.3389/FNAGI.2010.00032.  
58  
59 [6] Logan G D, et al."On the ability to inhibit simple and choice reaction time responses: a model and a method.." *Journal of experimental psychology. Human perception and performance* 10.2(1984):. doi:.  
60  
[7] Janette L. Smith, et al."Motor and non-motor inhibition in the Go/NoGo task: An ERP and fMRI study." *International Journal of Psychophysiology* 87.3(2013):. doi:10.1016/j.ijpsycho.2012.07.185.

- 1  
2  
3  
4  
5 [8] Frederick Verbruggen, and Gordon D. Logan. "Response inhibition in the stop-signal paradigm." *Trends in Cognitive Sciences* 12.11(2008):. doi:10.1016/j.tics.2008.07.005.  
6  
7 [9] Verbruggen Frederick, Chambers Christopher D.,and Logan Gordon D.. "Fictitious Inhibitory Differences: How Skewness and Slowing Distort the Estimation of Stopping Latencies." *Psychological Science* 24.3(2013):. doi:.  
8  
9 [10] Frederick Verbruggen, et al."A consensus guide to capturing the ability to inhibit actions and impulsive behaviors in the stop-signal task." *eLife* 8.(2019):. doi:10.7554/eLife.46323.  
10  
11 [11] Friehs Maximilian A.,and Frings Christian."Pimping inhibition: Anodal tDCS enhances stop-signal reaction time.." *Journal of Experimental Psychology: Human Perception and Performance* 44.12(2018):. doi:10.1037/XHP0000579.  
12  
13 [12]Maximilian A. Friehs, ,and Christian Frings."Cathodal tDCS increases stop-signal reaction time." *Cognitive, Affective, & Behavioral Neuroscience* 19.5(2019):. doi:10.3758/s13415-019-00740-0.  
14  
15 [13] Faul, F., ErdFelder, E., Lang, A.-G., Buchner, A., 2007. G\*Power 3.1 manual. *Behav. Res. Methods* 39 (2), 175–191.  
16  
17 [14] Michelle W. Voss, et al."Are expert athletes ‘expert’ in the cognitive laboratory? A meta - analytic review of cognition and sport expertise." *Applied Cognitive Psychology* 24.6(2010):. doi:10.1002/acp.1588.  
18  
19 [15] Chun-Hao Wang, et al."Open vs. Closed Skill Sports and the Modulation of Inhibitory Control." *PLOS ONE* 8.2(2013):. doi:10.1371/journal.pone.0055773.  
20  
21 [16]Di Russo Francesco, et al."Benefits of sports participation for executive function in disabled athletes.." *Journal of neurotrauma* 27.12(2010):. doi:10.1089/neu.2010.1501.  
22  
23 [17] Bjoern Krenn, et al."Sport type determines differences in executive functions in elite athletes." *Psychology of Sport & Exercise* 38.(2018):. doi:10.1016/j.psychsport.2018.06.002.  
24  
25  
26  
27  
28  
29  
30  
31  
32  
33  
34  
35  
36  
37  
38  
39  
40  
41  
42  
43  
44  
45  
46  
47  
48  
49  
50  
51  
52  
53  
54  
55  
56  
57  
58  
59  
60

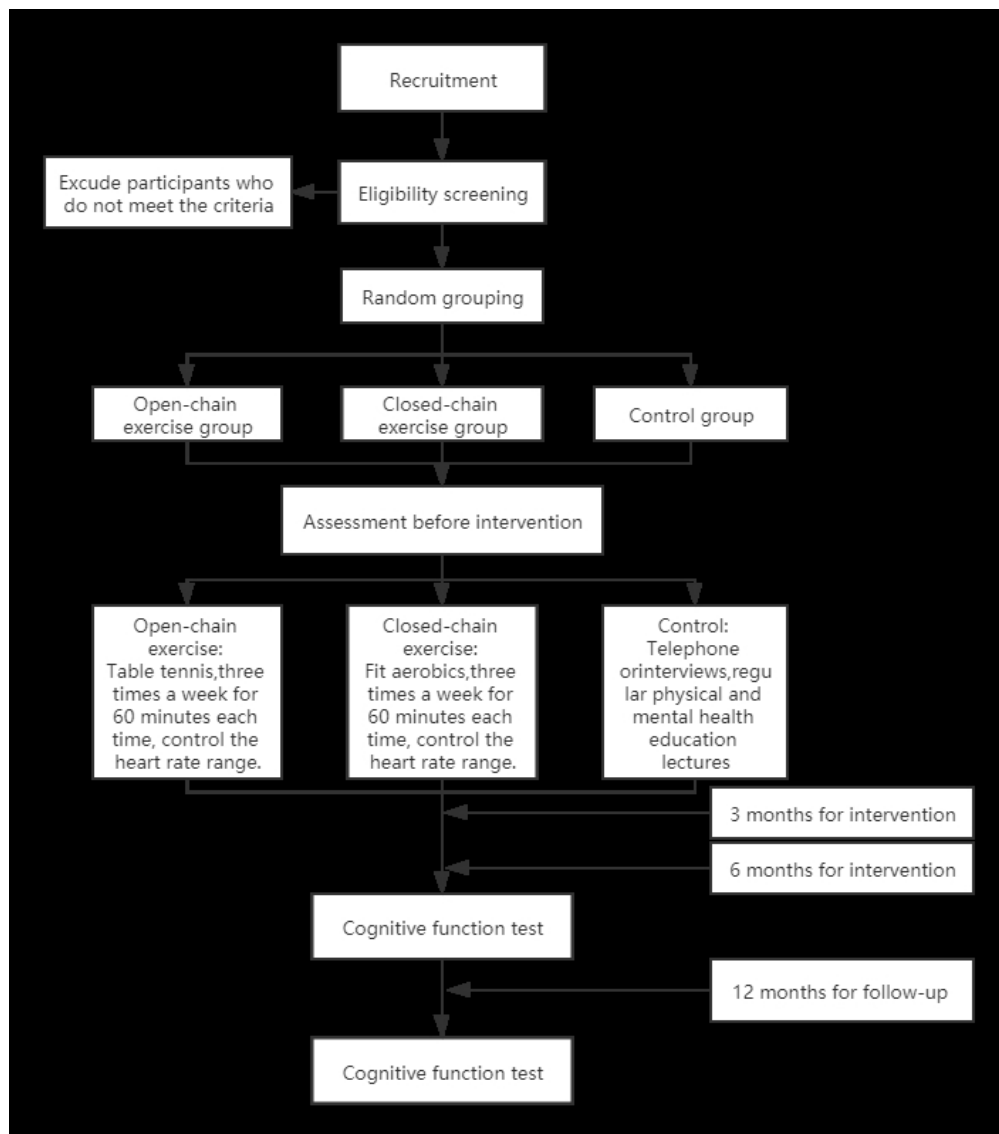

Figure 1. Flow diagram of the study design

1  
2  
3  
4  
5  
6  
7  
8  
9  
10  
11  
12  
13  
14  
15  
16  
17  
18  
19  
20  
21  
22  
23  
24  
25  
26  
27  
28  
29  
30  
31  
32  
33  
34  
35  
36  
37  
38  
39  
40  
41  
42  
43  
44  
45  
46  
47  
48  
49  
50  
51  
52  
53  
54  
55  
56  
57  
58  
59  
60

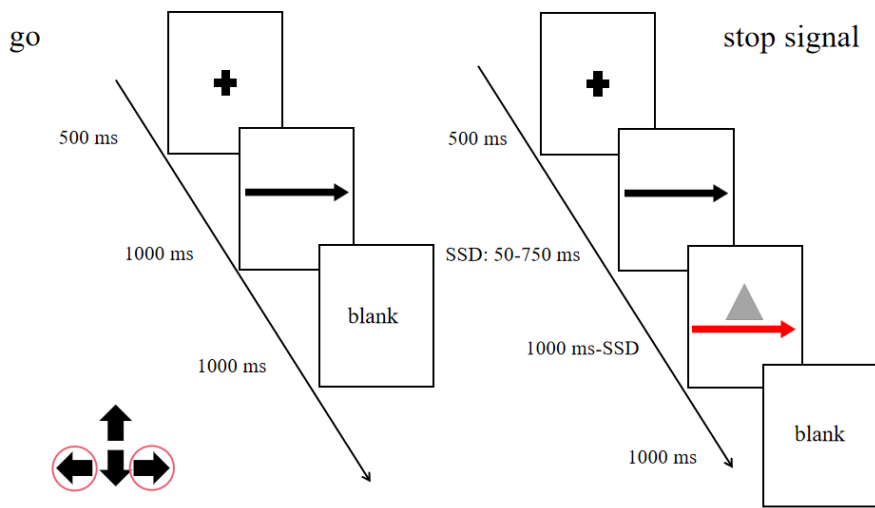

Figure 2. Stop signal task flow chart

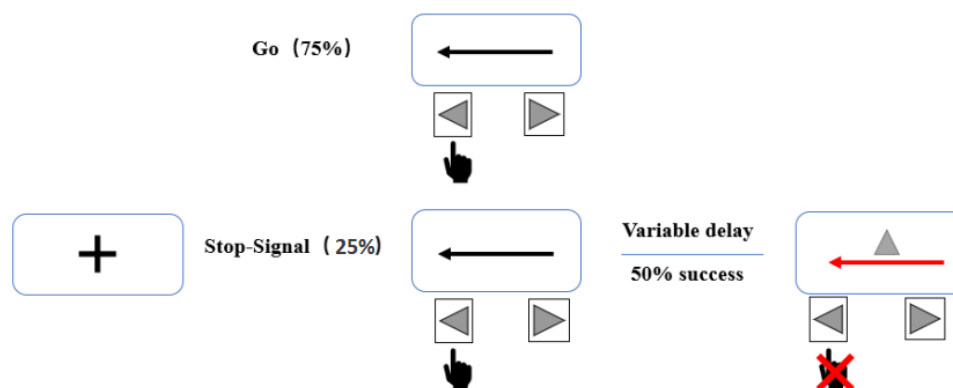

Figure 3. Stop behavioral task

The task will consist of randomly interspersed no-go and stop-signal trials. A total of 480 trials will be performed (75% go, 25% stop).

# BMJ Open

## Comparison of open- and closed-chain exercises in improving the response inhibitory ability of the elderly: a protocol for a randomized controlled clinical trial

|                                 |                                                                                                                                                                                                                                                                                     |
|---------------------------------|-------------------------------------------------------------------------------------------------------------------------------------------------------------------------------------------------------------------------------------------------------------------------------------|
| Journal:                        | <i>BMJ Open</i>                                                                                                                                                                                                                                                                     |
| Manuscript ID                   | bmjopen-2021-051966.R1                                                                                                                                                                                                                                                              |
| Article Type:                   | Protocol                                                                                                                                                                                                                                                                            |
| Date Submitted by the Author:   | 13-Sep-2021                                                                                                                                                                                                                                                                         |
| Complete List of Authors:       | ke, liu; Shanghai Punan Hospital of Pudong New District<br>lanlan, zhang; Guangzhou Sport University, School of Leisure Sport and Management<br>jian, zhang; Shanghai University of Sport, School of Psychology<br>jianing, wei; Shanghai University of Sport, School of Psychology |
| <b>Primary Subject Heading</b>: | Public health                                                                                                                                                                                                                                                                       |
| Secondary Subject Heading:      | Mental health, Public health                                                                                                                                                                                                                                                        |
| Keywords:                       | Old age psychiatry < PSYCHIATRY, MENTAL HEALTH, Biophysics < NATURAL SCIENCE DISCIPLINES, PUBLIC HEALTH                                                                                                                                                                             |
|                                 |                                                                                                                                                                                                                                                                                     |

SCHOLARONE™  
Manuscripts



I, the Submitting Author has the right to grant and does grant on behalf of all authors of the Work (as defined in the below author licence), an exclusive licence and/or a non-exclusive licence for contributions from authors who are: i) UK Crown employees; ii) where BMJ has agreed a CC-BY licence shall apply, and/or iii) in accordance with the terms applicable for US Federal Government officers or employees acting as part of their official duties; on a worldwide, perpetual, irrevocable, royalty-free basis to BMJ Publishing Group Ltd ("BMJ") its licensees and where the relevant Journal is co-owned by BMJ to the co-owners of the Journal, to publish the Work in this journal and any other BMJ products and to exploit all rights, as set out in our [licence](#).

The Submitting Author accepts and understands that any supply made under these terms is made by BMJ to the Submitting Author unless you are acting as an employee on behalf of your employer or a postgraduate student of an affiliated institution which is paying any applicable article publishing charge ("APC") for Open Access articles. Where the Submitting Author wishes to make the Work available on an Open Access basis (and intends to pay the relevant APC), the terms of reuse of such Open Access shall be governed by a Creative Commons licence – details of these licences and which [Creative Commons](#) licence will apply to this Work are set out in our licence referred to above.

Other than as permitted in any relevant BMJ Author's Self Archiving Policies, I confirm this Work has not been accepted for publication elsewhere, is not being considered for publication elsewhere and does not duplicate material already published. I confirm all authors consent to publication of this Work and authorise the granting of this licence.



1  
2  
3  
4 **Title:** Comparison of open- and closed-chain exercises in improving the response  
5  
6 inhibitory ability of the elderly: a protocol for a randomized controlled clinical  
7  
8  
9 trial  
10

11 **Article Type:** Clinical Study Protocol  
12

13  
14 **Keywords:** Elder; Open-chain exercise; Closed-chain exercise; Response inhibitory  
15  
16 ability; Study protocol  
17  
18

19 **Corresponding Author:** Jia-Ning Wei  
20

21  
22 **Corresponding Author's Institution:** Shanghai University of Sport  
23

24  
25 **First Author:** Ke Liu, Lan-Lan Zhang  
26

27 **Order of Authors:** Jian Zhang  
28

## 29 **Abstract**

30  
31  
32 **Introduction** As people age, they are more likely to experience a decline in their  
33  
34 response inhibition ability, which interferes with daily life. Previous studies have  
35  
36 shown that exercise intervention can improve the cognitive ability of the elderly, but  
37  
38 research on open- and closed-chain exercises to improve the response inhibition in  
39  
40 this age group is still limited. This study will explore the advantages of long-term  
41  
42 intervention of table tennis (open-chain exercise) compared with fit aerobics  
43  
44 (closed-chain exercise) on the response inhibitory ability of the elderly.  
45  
46  
47  
48  
49

50  
51 **Methods and analysis** A single-blind randomized controlled trial will be conducted.  
52  
53 A total of 90 elderly subjects will be recruited and allocated randomly to the  
54  
55 following groups: table tennis, fit aerobics, and control. The interventions for the table  
56  
57 tennis group and the fit aerobics group will be implemented in three 60-min sessions  
58  
59  
60

1  
2  
3  
4 per week for 6 months; the control group will receive no exercise intervention. The  
5  
6 primary assessment will be behavioral indicators of response inhibitory ability in the  
7  
8 elderly based on the stop signal task (SST). The secondary outcomes will include  
9  
10 cognitive ability, mental status, and depression in the elderly. Assessments will be  
11  
12 conducted at baseline, 3 months, 6 months, and 12 months.  
13  
14  
15

16  
17 **Ethics and dissemination** This study was approved by the Shanghai University of  
18  
19 Sport Research Ethics Committee (102772019RT012) and will provide reference for  
20  
21 the advantages of table tennis compared with other types of sports in improving the  
22  
23 response inhibitory ability of the elderly. The results of this study will provide a  
24  
25 theoretical basis for choosing the best exercise program to improve the response  
26  
27 inhibitory ability of the elderly.  
28  
29  
30  
31

32  
33 **Trial registration number** This study has been registered prospectively in the  
34  
35 Chinese Clinical Trial Registry (ChiCTR2100043616, 23 February 2021)  
36  
37  
38  
39  
40  
41  
42  
43  
44  
45  
46  
47  
48  
49  
50  
51  
52  
53  
54  
55  
56  
57  
58  
59  
60

1  
2  
3  
4 **Title:** Comparison of open- and closed-chain exercises in improving the response  
5  
6 inhibitory ability of the elderly: a protocol for a randomized controlled clinical trial  
7  
8  
9

10  
11  
12 **Type of Manuscript:** Clinical Study Protocol  
13

14 **Authors:** Ke Liu<sup>1†</sup>, Lan-Lan Zhang<sup>2†</sup>, Jian Zhang<sup>3</sup>, Jia-Ning Wei<sup>3\*</sup>  
15  
16

17  
18  
19 **Affiliation:**  
20

21  
22 <sup>1</sup> Shanghai Punan Hospital of Pudong New District, Shanghai, China  
23

24 <sup>2</sup> School of Leisure Sport and Management, Guangzhou Sport University,  
25  
26 Guangzhou, China  
27

28  
29 <sup>3</sup> School of Psychology, Shanghai University of Sport, Shanghai, China  
30

31  
32 † These authors contributed equally to this work.  
33  
34

35  
36  
37 **Figures and tables:** 3 figures and 3 tables  
38

39  
40 **Number of Words:** Abstract: 264 words; Manuscript: 4,177 words; 27 pages  
41  
42

43  
44  
45 **\* Corresponding author:**  
46

47  
48 Jia-Ning Wei  
49

50  
51 School of Psychology  
52

53  
54 Shanghai University of Sport  
55

56  
57 650 Qing Yuan Huan Road, Shanghai, China, 200438  
58

59  
60 E-mail: [2011916006@sus.edu.cn](mailto:2011916006@sus.edu.cn)

**Abbreviations**

SST, Stop signal task

SSRT, stop signal response time

SSD, stop signal delay

MoCA, Montreal Cognitive Assessment

BDI-II, Beck Depression Inventory (2nd edition);

MMSE, Mini Mental State Examination

1  
2  
3  
4 Comparison of open- and closed-chain exercises in improving the  
5  
6 response inhibitory ability of the elderly: a protocol for a  
7  
8 randomized controlled clinical trial  
9  
10  
11  
12  
13

14 **Abstract**

15  
16  
17 **Introduction** As people age, they are more likely to experience a decline in their  
18  
19 response inhibition ability, which interferes with daily life. Previous studies have  
20  
21 shown that exercise intervention can improve the cognitive ability of the elderly, but  
22  
23 research on open- and closed-chain exercises to improve the response inhibition in  
24  
25 this age group is still limited. This study will explore the advantages of long-term  
26  
27 intervention of table tennis (open-chain exercise) compared with fit aerobics  
28  
29 (closed-chain exercise) on the response inhibitory ability of the elderly.  
30  
31  
32  
33

34  
35 **Methods and analysis** A single-blind randomized controlled trial will be conducted.  
36  
37 A total of 90 elderly subjects will be recruited and allocated randomly to the  
38  
39 following groups: table tennis, fit aerobics, and control. The interventions for the table  
40  
41 tennis group and the fit aerobics group will be implemented in three 60-min sessions  
42  
43 per week for 6 months; the control group will receive no exercise intervention. The  
44  
45 primary assessment will be behavioral indicators of response inhibitory ability in the  
46  
47 elderly based on the stop signal task (SST). The secondary outcomes will include  
48  
49 cognitive ability, mental status, and depression in the elderly. Assessments will be  
50  
51 conducted at baseline, 3 months, 6 months, and 12 months.  
52  
53  
54  
55  
56  
57

58 **Ethics and dissemination** This study was approved by the Shanghai University of  
59  
60

1  
2  
3  
4 Sport Research Ethics Committee (102772019RT012) and will provide reference for  
5  
6 the advantages of table tennis compared with other types of sports in improving the  
7  
8 response inhibitory ability of the elderly. The results of this study will provide a  
9  
10 theoretical basis for choosing the best exercise program to improve the response  
11  
12 inhibitory ability of the elderly.  
13  
14  
15

16  
17 **Trial registration number** This study has been registered prospectively in the  
18  
19 Chinese Clinical Trial Registry (ChiCTR2100043616, 23 February 2021).  
20  
21

### 22 **Strengths and limitations of this study**

- 23  
24 1. The results of this study will provide a choosing the best exercise program to  
25  
26 improve the response inhibitory ability of the elderly.  
27  
28
- 29  
30 2. The effect of long-term exercise intervention on cognitive control is greatly  
31  
32 influenced by the screening and control of subjects.  
33  
34
- 35  
36 3. How to select and control participants in a longitudinal study is one of the  
37  
38 difficulties of this project.  
39  
40
- 41  
42 4. The patients will come from one geographic area which limits the generalisability.  
43  
44

### 45 **Introduction**

46  
47  
48 Response inhibition ability is a type of cognitive control ability that can achieve  
49  
50 behavioral goals by adjusting perception and motor function in the changing  
51  
52 environment as well as be used to solve conflicts.<sup>[1]</sup> As people age, they are likely to  
53  
54 experience a decline in their response inhibition ability,<sup>[2-5]</sup> which can interfere with  
55  
56 daily life and even the ability to live independently. Although some studies have  
57  
58  
59  
60

1  
2  
3  
4 shown that exercise intervention can improve the cognitive ability of the elderly,<sup>[6]</sup>  
5  
6 there are few studies on the effect of exercise intervention on reactive inhibition  
7  
8 ability. In particular, research on the different types of exercise to improve the  
9  
10 response inhibition ability of the elderly is still limited.  
11  
12

13  
14 Sports can be divided into closed kinetic chain activities and open kinetic  
15  
16 chain activities.<sup>[7]</sup> It is different from Open kinetic chain exercise (OKCE) and closed  
17  
18 kinetic chain exercise (CKCE) in exercise prescription.<sup>[8]</sup> The open and closed  
19  
20 mentioned here refer to the movement environment and movement methods, not the  
21  
22 fixed point of the extremity during movements. The operating environment of  
23  
24 closed-chain exercises, such as fit aerobics, fitness running, etc., is stable; and the  
25  
26 operating state is determined by the operator. In contrast, the operating environment  
27  
28 of open-chain exercises, including those involved in the sports of table tennis,  
29  
30 basketball, etc., is unstable; and the operation state is determined by external  
31  
32 conditions, such as a ball and opponents. In open-chain exercises, the participant must  
33  
34 continuously adjust their behavior to unpredictable stimuli and must invest more  
35  
36 cognitive resources in the decision-making process. Previous studies have shown that  
37  
38 open-chain exercises require more regulating capacity than closed-chain exercises.<sup>[9]</sup>  
39  
40 First, a study comparing the cognitive control of sports involving open-chain  
41  
42 exercises with that of closed-chain exercises has revealed that athletes engaging in  
43  
44 open-chain exercises have an advantage in cognitive control. It has been demonstrated  
45  
46 that intervention with long-term open-chain exercise can improve cognitive function  
47  
48  
49  
50  
51  
52  
53  
54  
55  
56  
57  
58  
59  
60

1  
2  
3  
4 better than closed-chain exercise,<sup>[10]</sup> but whether it can improve response inhibitory  
5  
6 ability better is not clear.  
7

8  
9 As one of the classical paradigms to test response inhibition, the stop signal  
10 task (SST) tests the complete suppression of an ongoing action. The SST instructs the  
11 participant to perform a response when the go signal appears, but after a few go  
12 signals appear, a stop signal will appear at a specific time interval, and the individual  
13 will be asked to stop the response as far as possible.<sup>[11]</sup> The strengths of this test are  
14 that a stop signal to evoke controlling behavior is administered after a go signal is  
15 used, and the interval between these two signals dynamically changes regularly.<sup>[12]</sup> In  
16 addition, the SST is capable of quantizing inhibitory control behavior. However, no  
17 response occurs when the participant holds up successfully. The stop signal response  
18 time (SSRT) is a more sensitive indicator to evaluate the response inhibitory  
19 ability.<sup>[13]</sup> In short, to calculate the SSRT, all go-reactions (i.e., go-trials in which the  
20 response was missed) are rank-ordered and assigned the maximum response time in  
21 order to compensate for the lacking response. Afterwards, the most recent stop signal  
22 delay (SSD) is subtracted from the response time corresponding to the stop-signal  
23 response percentile. The resulting value is termed the SSRT.<sup>[14,15]</sup> These results can be  
24 used as an important index to evaluate the response inhibitory ability.  
25  
26  
27  
28  
29  
30  
31  
32  
33  
34  
35  
36  
37  
38  
39  
40  
41  
42  
43  
44  
45  
46  
47  
48  
49

50 The proposed randomized clinical trial will examine the effects of table tennis  
51 (open-chain exercise) and fit aerobics (closed-chain exercise) on the primary outcome  
52 (behavioral task) of response inhibitory ability as well as on the secondary outcomes  
53 of cognitive ability, mental status, and depression in the elderly. We hypothesized that  
54  
55  
56  
57  
58  
59  
60



1  
2  
3  
4 different types of exercise intervention can affect the response inhibitory ability to  
5  
6  
7 varying degrees and that the effect of open-chain exercises is better.  
8  
9

## 10 11 **Methods**

### 12 13 **Study design**

14  
15  
16 This study protocol of a pilot study is designed as a prospective, single-blind  
17  
18 randomized controlled trial. Eligible participants will be randomized into table tennis,  
19  
20 fit aerobics, or control groups at a 1:1:1 ratio. The duration of exercise intervention  
21  
22 will be 6 months. The cognitive function test (questionnaire and behavioral task) will  
23  
24 be conducted before the intervention as well as at 3 months, 6 months, and 12 months  
25  
26 after the intervention. Participants who meet the criteria will undergo baseline  
27  
28 assessments. All evaluations will be done at baseline and immediately after the  
29  
30 exercise intervention (See Figure 1). We will recruit healthy right-handed elderly  
31  
32 participants with normal or corrected-to-normal vision and without a history of  
33  
34 neurological diseases in the same way. The study is scheduled to begin in August 2021  
35  
36 and continue until August 2023.  
37  
38  
39  
40  
41  
42  
43  
44  
45  
46  
47

48 Figure 1 Flow diagram of the study design  
49

### 50 51 **Participants**

52  
53 Any participants with heart disease, neurological disorder, musculoskeletal disorders,  
54  
55 and other conditions not suitable for physical activity, contraindications to fMRI or  
56  
57 TMS will be excluded. In addition, those with a regular exercise routine will be  
58  
59  
60

1  
2  
3  
4 excluded. All participants will be between the ages of 60 and 70 years old and  
5  
6 right-handed as assessed by the Edinburgh Handedness Inventory. Moreover, they  
7  
8 must have their own residence.  
9

10  
11 Before and after the intervention, all groups will have their demographics  
12  
13 statistically analyzed for factors such as health status, physical fitness, and cognitive  
14  
15 function (Table 1). Intergroup differences will be minimized before the intervention.  
16  
17  
18  
19  
20  
21

22 Table 1 Demographic and clinical characteristics of the study participants  
23

|                                                       | Open group | Closed group | Control |
|-------------------------------------------------------|------------|--------------|---------|
| 27 Age                                                |            |              |         |
| 28                                                    |            |              |         |
| 29 Gender (male:female)                               |            |              |         |
| 30                                                    |            |              |         |
| 31                                                    |            |              |         |
| 32 Hight                                              |            |              |         |
| 33                                                    |            |              |         |
| 34                                                    |            |              |         |
| 35 Body mass index (kg/m <sup>2</sup> )               |            |              |         |
| 36                                                    |            |              |         |
| 37 HRmax                                              |            |              |         |
| 38                                                    |            |              |         |
| 39                                                    |            |              |         |
| 40 Score for self-reported habitual physical activity |            |              |         |
| 41                                                    |            |              |         |
| 42                                                    |            |              |         |
| 43 MoCA                                               |            |              |         |
| 44                                                    |            |              |         |
| 45 BDI-II                                             |            |              |         |
| 46                                                    |            |              |         |
| 47                                                    |            |              |         |
| 48 MMSE                                               |            |              |         |
| 49                                                    |            |              |         |
| 50                                                    |            |              |         |
| 51 Behavioral tests for cognitive ability (RT)        |            |              |         |
| 52                                                    |            |              |         |
| 53 Behavioral test about cognitive ability (ACC)      |            |              |         |
| 54                                                    |            |              |         |

55  
56 MoCA, Montreal Cognitive Assessment; BDI-II, Beck Depression Inventory (2nd edition); MMSE, Mini Mental

57  
58 State Examination; Behavioral tests for cognitive ability: Stroop task testing, n-back task testing, task-switch task  
59  
60

1  
2  
3  
4 testing; RT, response time; ACC, accuracy.  
5  
6  
7  
8

## 9 **Sample size**

10  
11  
12 From our previous studies on the modulation of SST performance,<sup>[16,17]</sup> we expected  
13 an effect of  $r = 0.4$ . Together with an  $\alpha$ -value of 0.05 and a power of  $1 - \beta = 0.9$ , a  
14 sample of at least 72 participants (24/group) was planned to find a similar effect.  
15  
16 Calculations were carried out using G\*Power, version 3.1,<sup>[18]</sup> with anticipation of a  
17  
18  
19  
20  
21  
22  
23  
24  
25  
26  
27  
28  
29  
30  
31  
32  
33  
34  
35  
36  
37  
38  
39  
40  
41  
42  
43  
44  
45  
46  
47  
48  
49  
50  
51  
52  
53  
54  
55  
56  
57  
58  
59  
60  
20% attrition rate. Therefore, we plan to recruit 90 subjects (30/group).

## 27 **Randomisation**

28  
29  
30  
31  
32  
33  
34  
35  
36  
37  
38  
39  
40  
41  
42  
43  
44  
45  
46  
47  
48  
49  
50  
51  
52  
53  
54  
55  
56  
57  
58  
59  
60  
Eligible participants will be randomized into table tennis, fit aerobics, or control  
groups at a 1:1:1 ratio after consenting and baseline assessment. I will use The Excel  
software to code the subjects in 1-90 according to the recruitment time, and then use  
the formula '=RAND()' to generate the corresponding random sequence. By sorting  
the random sequence and then grouping it, 90 subjects will be randomly grouped.

## 45 **Exercise intervention**

46  
47  
48  
49  
50  
51  
52  
53  
54  
55  
56  
57  
58  
59  
60  
The exercise intervention will last for 6 months. The participants will be divided into  
three groups: table tennis, fit aerobics, and control. The table tennis (open-chain) and  
fit aerobics (closed-chain) groups will train for 60 min, three times a week. The  
exercise intensity will be monitored, ensuring that the heart rate remains in the range  
of 60–70% of the maximum heart rate ( $HR_{MAX} = 220 - \text{age}$ ). During the training

period, the exercise intensity will be monitored by the experimenter through real-time heart rate monitoring and the subject's subjective reaction. The exercise load and heart rate responses of the subjects will be recorded at each training session and adjusted accordingly with an increase of aerobic capacity. The entire intervention process will be monitored in real time by health care professionals. Specific intervention methods are shown in Table 2.

Table 2 Exercise intervention TIDieR

| Item NO | Brief name        | Group                                                                                                                                                                                                                            |                                                                                                                                                                                                                                  |                                                                                                                                                                                                                               |
|---------|-------------------|----------------------------------------------------------------------------------------------------------------------------------------------------------------------------------------------------------------------------------|----------------------------------------------------------------------------------------------------------------------------------------------------------------------------------------------------------------------------------|-------------------------------------------------------------------------------------------------------------------------------------------------------------------------------------------------------------------------------|
|         |                   | Table tennis group                                                                                                                                                                                                               | Fit aerobics group                                                                                                                                                                                                               | Control group                                                                                                                                                                                                                 |
| 1       | Why               | Table tennis                                                                                                                                                                                                                     | Fit aerobics                                                                                                                                                                                                                     | Control                                                                                                                                                                                                                       |
| 2       | What              | Participants will be led by professional table tennis coaches for 6 months of table tennis exercise.                                                                                                                             | Participants will be led by professional fit aerobics coaches for 6 months of fit aerobics exercise.                                                                                                                             | Keep the original living habits, do not have regular exercise, regularly attend health lectures and accept telephone follow-up. Participants will attend biweekly health talks and will be interviewed by phone once a month. |
| 3       | What (materials)  | Participants will do 60 minutes of exercise three times a week. Specific exercises will be described later.                                                                                                                      |                                                                                                                                                                                                                                  |                                                                                                                                                                                                                               |
| 4       | What (procedures) | Each participant received a test report before and at 3, 6, and 12 months after the start of the exercise so that they could understand their physical and psychological changes.                                                |                                                                                                                                                                                                                                  |                                                                                                                                                                                                                               |
| 5       | Who provided      | Table tennis coaches is the second level table tennis athlete in China from Shanghai University of Sport. The psychology-related tests were completed by ph. D. students majoring in psychology at Shanghai University of Sport. | Fit aerobics coaches is the second level fit aerobics athlete in China from Shanghai University of Sport. The psychology-related tests were completed by ph. D. students majoring in psychology at Shanghai University of Sport. | The health lecture was completed by ph. D. students majoring in physical Education and training in Shanghai University of Sport, and the telephone return visit was completed by ph. D. students majoring in psychology.      |

|    |   |         |                                                                                                                               |                                     |
|----|---|---------|-------------------------------------------------------------------------------------------------------------------------------|-------------------------------------|
| 1  |   |         |                                                                                                                               |                                     |
| 2  |   |         |                                                                                                                               |                                     |
| 3  |   |         |                                                                                                                               |                                     |
| 4  |   |         |                                                                                                                               | Health lectures will be             |
| 5  |   |         |                                                                                                                               | conducted face to face              |
| 6  | 6 | How     | The exercise intervention will take place in a stationary gym, where the instructor will direct the whole group face to face. | in a group format, and              |
| 7  |   |         |                                                                                                                               | telephone return visits             |
| 8  |   |         |                                                                                                                               | will be conducted one               |
| 9  |   |         |                                                                                                                               | by one.                             |
| 10 |   |         |                                                                                                                               |                                     |
| 11 |   |         | Table tennis training is held in                                                                                              | Fit aerobic trianing is conducted   |
| 12 |   |         | China Table Tennis College of                                                                                                 | in the School of Physical           |
| 13 |   |         | Shanghai Sport                                                                                                                | Education and Training of           |
| 14 | 7 | Where   | University. There is a                                                                                                        | Shanghai Sport University. There    |
| 15 |   |         | professional table tennis                                                                                                     | is a professional aerobics training |
| 16 |   |         | training ground.                                                                                                              | ground.                             |
| 17 |   |         |                                                                                                                               |                                     |
| 18 |   |         |                                                                                                                               |                                     |
| 19 |   |         |                                                                                                                               |                                     |
| 20 |   |         | The table tennis (open-chain) and fit aerobics (closed-chain) groups                                                          |                                     |
| 21 |   |         | will train for 60 min, three times a week. The exercise intensity will                                                        |                                     |
| 22 |   |         | be monitored, ensuring that the heart rate remains in the range of                                                            |                                     |
| 23 |   |         | 60–70% of the maximum heart rate (HRMAX = 220 – age).                                                                         |                                     |
| 24 |   |         |                                                                                                                               |                                     |
| 25 |   |         |                                                                                                                               |                                     |
| 26 |   |         |                                                                                                                               |                                     |
| 27 |   |         | Each session will consist of a                                                                                                | The participants in the             |
| 28 |   |         | warm-up for 10 min, table                                                                                                     | closed-chain exercise group will    |
| 29 |   |         | tennis practice under the                                                                                                     | attend a supervised fit aerobics    |
| 30 |   |         | guidance of a coach for 40                                                                                                    | class of the same frequency,        |
| 31 |   |         | min, and relaxation for 10                                                                                                    | duration, and length as the         |
| 32 |   |         | min. The degree of difficulty                                                                                                 | open-chain exercise group. Fit      |
| 33 |   |         | of training throughout the                                                                                                    | aerobics at 50–60% of the           |
| 34 |   |         | program will be gradually                                                                                                     | maximum heart rate for the first    |
| 35 |   |         | increased. Table tennis at 50–                                                                                                | two weeks, followed by 60–70%       |
| 36 |   |         | 60% of the maximum heart                                                                                                      | of the maximum heart rate. Each     |
| 37 | 8 | When    | rate for the first two weeks,                                                                                                 | fit aerobics class will consist of  |
| 38 |   | and how | followed by 60–70% of the                                                                                                     | warm-up activities for 10 min,      |
| 39 |   | much    | maximum heart rate. The                                                                                                       | basic aerobics activities for 40    |
| 40 |   |         | training will consist of the                                                                                                  | min., and relaxation and            |
| 41 |   |         | following seven main parts:                                                                                                   | stretching for 10 min. The fit      |
| 42 |   |         | (1) footwork; (2) the serve; (3)                                                                                              | aerobics training will involve the  |
| 43 |   |         | forehand backhand attack; (4)                                                                                                 | following: 1) jogging, rope         |
| 44 |   |         | forehand backhand loop; (5)                                                                                                   | skipping, and/or gymnastics to      |
| 45 |   |         | kill shot; (6) continuous hitting                                                                                             | warm up and achieve a slightly      |
| 46 |   |         | of directional or                                                                                                             | sweating body, and the heart rate   |
| 47 |   |         | nondirectional balls randomly                                                                                                 | will be slightly faster; 2)         |
| 48 |   |         | sent by the server; and (7)                                                                                                   | stepping, side parallel step, side  |
| 49 |   |         | comprehensive practice. All                                                                                                   | cross step, jumping jacks,          |
| 50 |   |         | the technical movements will                                                                                                  | lunging, kicking, and so on.        |
| 51 |   |         | be from simple to complex.                                                                                                    | Following the rhythm of the         |
| 52 |   |         |                                                                                                                               | music, each action will be          |
| 53 |   |         |                                                                                                                               | reduced from four sets to two sets  |
| 54 |   |         |                                                                                                                               |                                     |
| 55 |   |         |                                                                                                                               |                                     |
| 56 |   |         |                                                                                                                               |                                     |
| 57 |   |         |                                                                                                                               |                                     |
| 58 |   |         |                                                                                                                               |                                     |
| 59 |   |         |                                                                                                                               |                                     |
| 60 |   |         |                                                                                                                               |                                     |

---

and then to one set; 3) relax the shoulder, elbow, hip, and knee joints by doing a few stretches to help relax the muscles.

Exercise interventions were performed at 50-60% of maximum heart rate for the first two weeks, followed by 60-70% of maximum heart rate. In order to ensure the safety of participants, the exercise intensity will be gradually increased, and the first two weeks will be mainly acclimatization.

How well (planned) Feedback will be given to each participant on a regular basis, including their physical and psychological data, as well as their motor skills learning performance. Keep them up to date on their progress and status to keep them engaged.

---

### ***SST protocol***

The SST was programmed using E-prime 2, in which the subjects will be asked to press a "←" button or a "→" button according to the left and right arrow directions. In 25% of the trials, the arrow will turn red and a gray triangle will appear; the participants will press the button to stop or give no response. The interval of stimulation will be dynamically adjusted according to the tracking procedure. The task will be divided into four groups of 120 trials each. The task flow is shown in Figure 2. The execution go signal reaction time (GoRT), stop response reaction time (SRRT), SSD, and SSRT will be investigated. GoRT is how long it takes for the participant to respond after the GO (black arrow) appears. SRRT is the time to respond to the stop signal (arrow turning red) task. SSD is the time between the task stimulus and the stop signal.

Figure 2 Stop signal task flow chart

The instructions for the experiment will be follows: Welcome to the experiment. First, "+" will appear in the center of the screen to alert the user to begin the keystroke reaction, and the right index finger should be placed on the "↓" to prepare for the experiment. When the black arrow appears in the center of the screen, use your right index finger to press the button. When the left arrow appears, use your index finger to press the "←" key on the keyboard. When the right arrow appears, use your index finger to press the "→" key on the keyboard. After each key response, the right index finger should quickly return to the "↓" key to wait for the next response. When the black arrow in the center of the screen turns red and a small gray triangle appears, please stop the keystroke reaction immediately. When the red arrow appears in the center of the screen, please do not perform any keystroke reaction. Let's move on to practice.

## **Outcomes**

### **Primary outcome**

#### *Behavioral task*

The task will include randomly interspersed no-go and stop-signal trials, which will enable us to examine both types of inhibition. A total of 480 trials will be performed, including 75% go trials and 25% stop trials. On go trials, the subjects will respond to a left/right black arrow (1000 ms) by pressing the buttons with their right hand.

1  
2  
3  
4 Responses will be made with the index finger (for the left or right arrow). In the  
5  
6 stop-signal trials, a response will be initially cued by a left/right black arrow, but the  
7  
8 arrow color will change to red concurrent with a gray triangle after a SSD, and the  
9  
10 subjects will be asked not to respond. The SSD will be varied from trial to trial by  
11  
12 using a step-up/down algorithm with an initial estimate of 250 ms to maintain 50%  
13  
14 successful inhibition. The task flow chart is shown in Figure 3.  
15  
16  
17  
18  
19  
20  
21

22 Figure 3 Stop behavioral task  
23

24 The task will consist of randomly interspersed no-go and stop-signal trials. A total of 480 trials  
25  
26 will be performed (75% go, 25% stop).  
27  
28  
29  
30  
31

### 32 **Secondary outcomes** 33

34 Secondary outcome measures will include the following: (1) Montreal Cognitive  
35  
36 Assessment (MoCA); (2) BDI-II; (3) MMSE; (4) Stroop task testing; (5) n-back task  
37  
38 testing; and (6) task-switch task testing (Table 3). The process of inhibitory control is  
39  
40 the process of inhibition, refresh, and switching of the response task through cognitive  
41  
42 function, so we will test the abilities of inhibition, refresh, and switching in the  
43  
44 cognitive process of the elderly with different exercise types before and after the  
45  
46 intervention by the Stroop task, the n-back task, and the task-switch task to compare  
47  
48 their response inhibitory ability. The details of each outcome and instrument will be  
49  
50 compiled as in Table 3.  
51  
52  
53  
54  
55  
56  
57  
58  
59  
60



Table 3 The differences among the three groups of subjects at various stages

|                 | Group | Baseline | 6 months | 12 months | 18 months | 24 months | F (P value)<br>Time effect | F (P value)<br>Group effect | F (P value)<br>Interaction effect |
|-----------------|-------|----------|----------|-----------|-----------|-----------|----------------------------|-----------------------------|-----------------------------------|
| MoCA            |       | Open     |          |           |           |           |                            |                             |                                   |
|                 |       | Closed   |          |           |           |           |                            |                             |                                   |
|                 |       | Control  |          |           |           |           |                            |                             |                                   |
| BDI-II          |       | Open     |          |           |           |           |                            |                             |                                   |
|                 |       | Closed   |          |           |           |           |                            |                             |                                   |
|                 |       | Control  |          |           |           |           |                            |                             |                                   |
| MMSE            |       | Open     |          |           |           |           |                            |                             |                                   |
|                 |       | Closed   |          |           |           |           |                            |                             |                                   |
|                 |       | Control  |          |           |           |           |                            |                             |                                   |
| Stroop<br>(RT)  |       | Open     |          |           |           |           |                            |                             |                                   |
|                 |       | Closed   |          |           |           |           |                            |                             |                                   |
|                 |       | Control  |          |           |           |           |                            |                             |                                   |
| n-back<br>(ACC) |       | Open     |          |           |           |           |                            |                             |                                   |
|                 |       | Closed   |          |           |           |           |                            |                             |                                   |
|                 |       | Control  |          |           |           |           |                            |                             |                                   |
| Task-switch     |       | Open     |          |           |           |           |                            |                             |                                   |
|                 |       | Closed   |          |           |           |           |                            |                             |                                   |

---

(ACC) Control

---

MoCA, Montreal Cognitive Assessment; BDI-II, Beck Depression Inventory (2nd edition); MMSE, Mini Mental State Examination; RT, response time; ACC, accuracy.

### *MoCA*

The MoCA is an assessment tool for the rapid screening of cognitive dysfunction. It includes 11 items in 8 cognitive domains: attention and concentration, executive function, memory, language, abstract thinking, and computation.<sup>[19]</sup> The highest possible total score is 30, and a score of 26 or more is normal. It has a high sensitivity and a short test time, so it is suitable for clinical application.

### *BDI-II*

The BDI-II contains 21 topics, which are suitable for people older than 13 years old. The areas of focus include symptoms of depression, such as despair, sensitivity, ways of understanding things, and physical characteristics, such as fatigue, weight loss, and decreased sexual ability.<sup>[20]</sup>

### *MMSE*

The MMSE scale includes the following seven aspects: time orientation, place orientation, immediate memory, attention and calculation, delayed memory, language, and visual space.<sup>[21]</sup> There are a total of 30 questions asked in the exam, with 1 point awarded for each correct answer, and 0 points given for each wrong answer or

1  
2  
3  
4 unanswerd question. The total score range of the scale is 0–30 points. The test scores  
5  
6 are closely related to the educational level of the subject. The normal cut-off values  
7  
8 are as follows: illiterate subjects, >17; primary school education only, >20; junior  
9  
10 high school education and above, >24.  
11  
12  
13  
14  
15  
16

### 17 *Stroop task*

18  
19 After a period of exercise intervention, comparison of the Stroop task response time  
20  
21 between the open-chain, closed-chain, and control groups will be used to explore  
22  
23 which types of exercise can improve cognitive inhibition ability<sup>[22]</sup>.  
24  
25  
26  
27  
28  
29

### 30 *N-back task*

31  
32 By comparing the n-back task accuracy of the elderly in the three groups, the  
33  
34 improvement of the cognitive refresh ability of each group will be compared under  
35  
36 different cognitive loads.<sup>[23]</sup>  
37  
38  
39  
40  
41  
42

### 43 *Task-switch task*

44  
45 By comparing the task-switch accuracy of the three groups under different stimulus  
46  
47 conditions, we will determine which type of exercise can improve the cognitive  
48  
49 transformation ability most significantly.<sup>[24]</sup>  
50  
51  
52  
53  
54  
55

## 56 **Patient and public involvement**

57  
58 Participants have not been involved in the study recruitment. The authors conceived  
59  
60

1  
2  
3  
4 the initial research questions and outcome measures, and modified according to the  
5  
6 telephone interviews with patients and their guardians by a research assistant. In order  
7  
8 to assure the safety and feasibility of the intervention, we invited six elderly peoples  
9  
10 to learn and practise the table tennis and fit aerobics exercise before designing the  
11  
12 RCT. Table tennis and fit aerobics exercise were revised based on the exercise  
13  
14 performance and feedback provided by the participants. The burden of the  
15  
16 intervention will be assessed by patients and their advisors through face-to-face  
17  
18 interviews before signing informed consent. The findings of the study will be  
19  
20 disseminated to the participants and their guardians.  
21  
22  
23  
24  
25  
26  
27  
28  
29

### 30 **Statistical analysis**

31  
32 In order to ensure no inter-group differences in all test indicators after random  
33  
34 grouping, Independent-sample T test will be performed on each pretest data after  
35  
36 random grouping. Repeated-measures analysis of variance will be used to determine  
37  
38 the effects of different types of exercise (open, closed, or control) on the primary  
39  
40 outcomes (GoRT, SRRT, SSD, and SSRT) as well as on the secondary outcomes  
41  
42 (MOCA score, BDI-II score, MMSE score, Stroop response time, n-back accuracy,  
43  
44 task-switch accuracy), with group and time serving as factors. The above data is  
45  
46 analyzed by specialized PhD students, they analyse the data be blind to group  
47  
48 allocation.  
49  
50  
51  
52  
53  
54  
55  
56  
57

### 58 **Discussion**

1  
2  
3  
4 Studies have found that elderly people who participate in ball and racket projects have  
5  
6 higher health and physical awareness.<sup>[25]</sup> Pilates exercises decreased depression and  
7  
8 improved the balance related to falling in elderly,<sup>[26]</sup> and also experienced significant  
9  
10 improvement in physical, social spiritual, and emotional wellness.<sup>[27]</sup> Korean scholars  
11  
12 found the cognitive/exercise dual-task program was an effective intervention for  
13  
14 improving cognitive function, health status, and life satisfaction, and for decreasing  
15  
16 depression of the elderly living in the community.<sup>[28]</sup>  
17  
18  
19  
20  
21

22 Then some researchers found that athletes participating in open-chain exercises  
23  
24 have a faster switching speed, fewer cognitive resources, and a higher efficiency in  
25  
26 the inhibition process.<sup>[29]</sup> At the same time, another study has demonstrated that  
27  
28 athletes who engage in open-chain exercises have a stronger reaction switching  
29  
30 capability.<sup>[30]</sup> Based on previous research, participating in sports involving open-chain  
31  
32 exercises can improve the ability of inhibition, refresh, and conversion in the  
33  
34 inhibitory control process. In the Stoop task, when two different dimensions of a  
35  
36 stimulus interfere with each other, it is necessary for participants to inhibit the  
37  
38 interfering stimulus, it looked at the participants' ability to suppress interference. In  
39  
40 the n-back task, participants' attention capacity and memory capacity could be  
41  
42 examined during the process of stimulus updating. In task-switch task, participants  
43  
44 need to keep their attention focused when switching between different tasks, so it can  
45  
46 investigate the transformation ability of participants in the cognitive process.  
47  
48 Therefore, in this study, the Stroop task, n-back task, and task-switch task were  
49  
50 selected as secondary outcomes to investigate the inhibition, refresh, and  
51  
52  
53  
54  
55  
56  
57  
58  
59  
60

1  
2  
3  
4 transformation abilities, respectively, of the participants. Determining the effect of  
5  
6 long-term intervention of different types of sports on the response inhibitory ability of  
7  
8 the elderly will improve our understanding of inhibitory control degradation and  
9  
10 support the development of diversified training programs.  
11  
12

13  
14 This study will use the SST to explore how different types of exercise  
15  
16 experience affect the response inhibition ability in the elderly. Because of the  
17  
18 interactions of the cognitive level, depressive state, and mental state with the response  
19  
20 inhibitory ability, we will perform multiple MoCA, BDI-II, MMSE measurements  
21  
22 before and after each intervention. We will also explore whether sports involving  
23  
24 open-chain exercises can improve the cognitive level, depression state, and mental  
25  
26 state of the elderly while improving their inhibition and control ability. Through  
27  
28 multi-dimensional measurements of the participants, we hope to provide a more  
29  
30 sufficient theoretical basis for the mechanism of improving the inhibition and control  
31  
32 ability of the elderly through exercise.  
33  
34  
35  
36  
37  
38  
39

40 This study will have several limitations. In this research, the screening  
41  
42 principles of the subjects will be determined in the longitudinal study, and the  
43  
44 inclusion criteria and exclusion criteria will be strictly defined, especially the  
45  
46 experimental groups and the control group in terms of age, physical level, intervention  
47  
48 time, and intensity. In addition, because the exercise that will serve as an intervention  
49  
50 will be widely known to the participants, the single-blind design may expose the study  
51  
52 to risks of bias stemming from performance and evaluation, which may potentially  
53  
54 lead to overestimation of the effects of exercise.  
55  
56  
57  
58  
59  
60

## Ethics and dissemination

All participants who meet the inclusion and exclusion criteria will be required to sign an informed consent form prior to enrolling in the study. This study was approved by the Shanghai University of Sport Research Ethics Committee (102772019RT012).

Funding: This study was supported by grants from the National Natural Science Foundation of China (3197070657) .

## Contributorship statement

Ke Liu: Conceptualization, Methodology, SoftwarePriya. Lanlan Zhang: Writing- Reviewing and Editing. Jian Zhang: Visualization, Investigation. Jia-Ning Wei: Data curation, Writing- Original draft preparation.

## References

- 
- [1] Logan Gordon D, et al. "On the ability to inhibit thought and action: general and special theories of an act of control.." *Psychological review* 121.1(2014): doi:10.1037/a0035230
- [2] Darowski Emily S, et al. "Age-related differences in cognition: the role of distraction control.." *Neuropsychology* 22.5(2008):. doi:10.1037/0894-4105.22.5.638.
- [3] Chen T Y, et al. "Cognitive Aging and Executive Decline Hypothesis." *Advances in Psychological Science* .05(2004):729-736. doi:CNKI:SUN:XLXD.0.2004-05-011.
- [4] Fergus I.M. Craik, ,and Ellen Bialystok. "Cognition through the lifespan: mechanisms of change." *Trends in Cognitive Sciences* 10.3(2006):. doi:10.1016/j.tics.2006.01.007.
- [5] Timothy A. Salthouse. "Aging and measures of processing speed." *Biological Psychology* 54.1(2000):. doi:10.1016/S0301-0511(00)00052-1.
- [6] Zhang, N. N. , et al. "Effect of long-term Tai Chi exercise on cognitive function of middle-aged and old people." *Chinese Journal of Clinical Rehabilitation* 26(2006):7-9. doi:CNKI:SUN:XDKF.0.2006-26-004..

- [7] Voss Michelle W., et al."Plasticity of Brain Networks in a Randomized Intervention Trial of Exercise Training in Older Adults." *Frontiers in Aging Neuroscience* .(2010):. doi:10.3389/FNAGI.2010.00032.
- [8] Soul Cheon, et al."Acute Effects of Open Kinetic Chain Exercise Versus Those of Closed Kinetic Chain Exercise on Quadriceps Muscle Thickness in Healthy Adults." *International Journal of Environmental Research and Public Health* 17.13(2020): doi:10.3390/ijerph17134669.
- [9] Michelle W. Voss, et al."Are expert athletes ‘expert’ in the cognitive laboratory? A meta - analytic review of cognition and sport expertise." *Applied Cognitive Psychology* 24.6(2010):. doi:10.1002/acp.1588.
- [10] Chun-Hao Wang, et al."Open vs. Closed Skill Sports and the Modulation of Inhibitory Control." *PLOS ONE* 8.2(2013):. doi:10.1371/journal.pone.0055773.
- [11] Logan G D, et al."On the ability to inhibit simple and choice reaction time responses: a model and a method.." *Journal of experimental psychology. Human perception and performance* 10.2(1984):. doi:10.1037/0096-1523.10.2.276.
- [12] Janette L. Smith, et al."Motor and non-motor inhibition in the Go/NoGo task: An ERP and fMRI study." *International Journal of Psychophysiology* 87.3(2013):. doi:10.1016/j.ijpsycho.2012.07.185.
- [13] Frederick Verbruggen, ,and Gordon D. Logan."Response inhibition in the stop-signal paradigm." *Trends in Cognitive Sciences* 12.11(2008):. doi:10.1016/j.tics.2008.07.005.
- [14] Verbruggen Frederick, Chambers Christopher D.,and Logan Gordon D.."Fictitious Inhibitory Differences: How Skewness and Slowing Distort the Estimation of Stopping Latencies." *Psychological Science* 24.3(2013):. doi:10.1177/0956797612457390:.
- [15] Frederick Verbruggen, et al."A consensus guide to capturing the ability to inhibit actions and impulsive behaviors in the stop-signal task." *eLife* 8.(2019):. doi:10.7554/eLife.46323.
- [16] Friehs Maximilian A.,and Frings Christian."Pimping inhibition: Anodal tDCS enhances stop-signal reaction time.." *Journal of Experimental Psychology: Human Perception and Performance* 44.12(2018):. doi:10.1037/XHP0000579.
- [17]Maximilian A. Friehs, ,and Christian Frings."Cathodal tDCS increases stop-signal reaction time." *Cognitive, Affective, & Behavioral Neuroscience* 19.5(2019):. doi:10.3758/s13415-019-00740-0.
- [18] Faul, F., ErdFelder, E., Lang, A.-G., Buchner, A., 2007. G\*Power 3.1 manual. *Behav. Res. Methods* 39 (2), 175–191.
- [19] Gao,F. The application of moca test and DTI in mild cognitive impairment. Diss. 2008.*PLA Military Medical Training College*, MA thesis.
- [20] F Holländare, G. Andersson , and I Engström. "A Comparison of Psychometric Properties Between Internet and Paper Versions of Two Depression Instruments (BDI-II and MADRS-S) Administered to Clinic Patients." *Journal of Medical Internet Research* 12.5(2010):76-79.
- [21] SMD Azmeh, et al. *Mini-Mental State Examination (MMSE)*. Springer New York, 2011.
- [22] Chen, Ji, et al. "The Latest advances of the Stroop Effect-its theory, paradigms, affecting factors." *Journal of Psychological Science*. 02(2007):415-418+390. doi:10.16719/j.cnki.1671-6981.2007.02.042.
- [23] Song, HK. "The evolution and application of N-back paradigm." *Journal of Southwest University(Social Sciences Edition)*37.S1(2011):81-82. doi:10.13718/j.cnki.xdsk.2011.s1.065.
- [24] Shi, Y. , and X. Zhou . "Task Switching, A Paradigm in the Study of Executive Control." *Advances in Psychological Science*. 05(2004):672-679. doi:CNKI:SUN:XLXD.0.2004-05-004.
- [25] Ahn, C., & Lee, W. (2021). The Difference between exercise effect, health and fitness perception according to the degree of exercise participation of the elderly. *Journal of adapted physical activity and exercise*, 29(2), 245-254.
- [26] Mahyar Mokhtari, et al."The Effect of 12-Week Pilates Exercises on Depression and Balance Associated with Falling in the Elderly." *Procedia - Social and Behavioral Sciences* 70.(2013): doi:10.1016/j.sbspro.2013.01.246.
- [27] Roh Su Yeon."The effect of 12-week Pilates exercises on wellness in the elderly.." *Journal of exercise rehabilitation* 12.2(2016): doi:10.12965/jer.1632590.295.
- [28] Mahyar Mokhtari, et al."The Effect of 12-Week Pilates Exercises on Depression and Balance Associated with Falling in the Elderly." *Procedia - Social and Behavioral Sciences* 70.(2013): doi:10.1016/j.sbspro.2013.01.246.



- 
- 1  
2  
3  
4  
5 [29]Di Russo Francesco, et al."Benefits of sports participation for executive function in disabled athletes.." *Journal*  
6 *of neurotrauma* 27.12(2010):. doi:10.1089/neu.2010.1501.  
7  
8 [30] Bjoern Krenn, et al."Sport type determines differences in executive functions in elite athletes." *Psychology of*  
9 *Sport & Exercise* 38.(2018):. doi:10.1016/j.psychsport.2018.06.002.  
10  
11  
12  
13  
14  
15  
16  
17  
18  
19  
20  
21  
22  
23  
24  
25  
26  
27  
28  
29  
30  
31  
32  
33  
34  
35  
36  
37  
38  
39  
40  
41  
42  
43  
44  
45  
46  
47  
48  
49  
50  
51  
52  
53  
54  
55  
56  
57  
58  
59  
60

For peer review only

1  
2  
3  
4  
5  
6  
7  
8  
9  
10  
11  
12  
13  
14  
15  
16  
17  
18  
19  
20  
21  
22  
23  
24  
25  
26  
27  
28  
29  
30  
31  
32  
33  
34  
35  
36  
37  
38  
39  
40  
41  
42  
43  
44  
45  
46  
47  
48  
49  
50  
51  
52  
53  
54  
55  
56  
57  
58  
59  
60

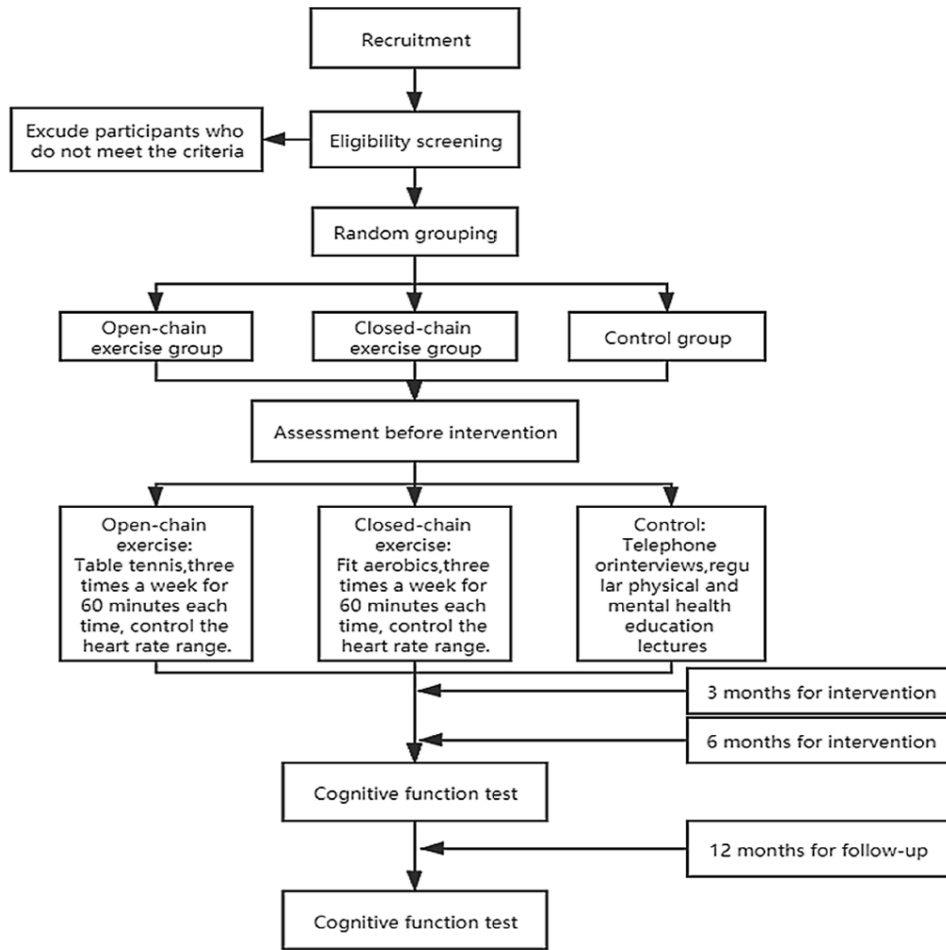

Figure 1 Flow diagram of the study design

90x90mm (300 x 300 DPI)

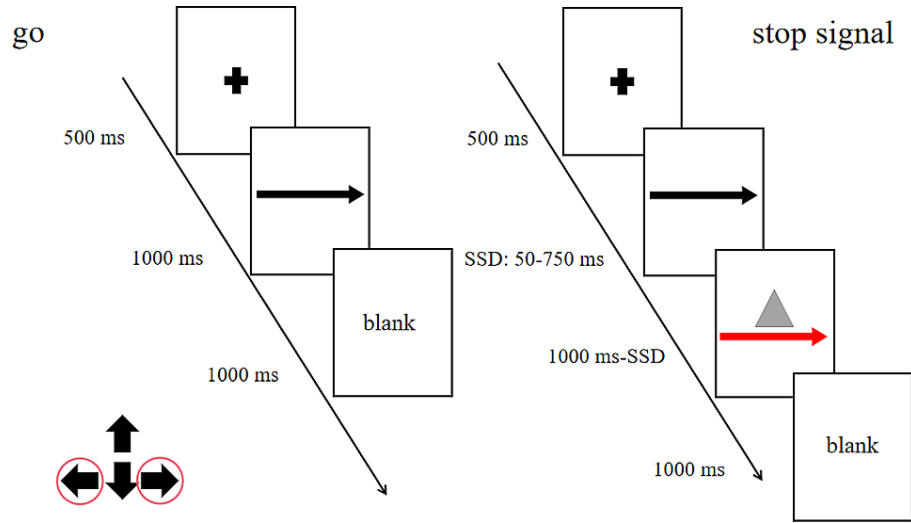

Figure 2. Stop signal task flow chart

90x90mm (300 x 300 DPI)

1  
2  
3  
4  
5  
6  
7  
8  
9  
10  
11  
12  
13  
14  
15  
16  
17  
18  
19  
20  
21  
22  
23  
24  
25  
26  
27  
28  
29  
30  
31  
32  
33  
34  
35  
36  
37  
38  
39  
40  
41  
42  
43  
44  
45  
46  
47  
48  
49  
50  
51  
52  
53  
54  
55  
56  
57  
58  
59  
60

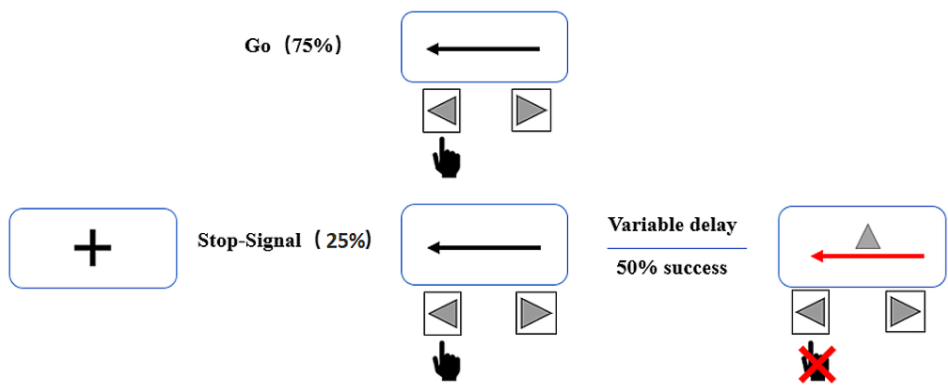

Figure 3. Stop behavioral task  
The task will consist of randomly interspersed no-go and stop-signal trials. A total of 480 trials will be performed (75% go, 25% stop).

90x90mm (300 x 300 DPI)

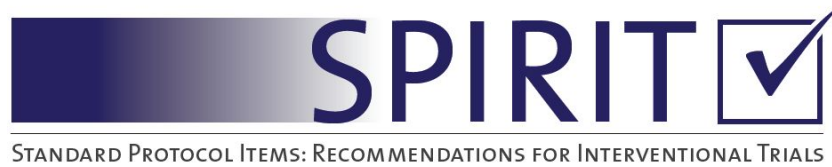

SPIRIT 2013 Checklist: Recommended items to address in a clinical trial protocol and related documents\*

| Section/item                      | Item No | Description                                                                                                                                                                                                                                                                                                                                                                                                                                                                                                                                                                                        |
|-----------------------------------|---------|----------------------------------------------------------------------------------------------------------------------------------------------------------------------------------------------------------------------------------------------------------------------------------------------------------------------------------------------------------------------------------------------------------------------------------------------------------------------------------------------------------------------------------------------------------------------------------------------------|
| <b>Administrative information</b> |         |                                                                                                                                                                                                                                                                                                                                                                                                                                                                                                                                                                                                    |
| Title                             | 1       | Comparison of open- and closed-chain exercises in improving the response inhibitory ability of the elderly: a protocol for a randomized controlled clinical trial (page 8,line 4)                                                                                                                                                                                                                                                                                                                                                                                                                  |
| Trial registration                | 2a      | This study has been registered prospectively in the Chinese Clinical Trial Registry (ChiCTR2100043616, 23 February 2021). (page 9,line 17)                                                                                                                                                                                                                                                                                                                                                                                                                                                         |
|                                   | 2b      |                                                                                                                                                                                                                                                                                                                                                                                                                                                                                                                                                                                                    |
| Protocol version                  | 3       | The study is scheduled to begin in August 2021 and continue until August 2023. (page 12,line 40)                                                                                                                                                                                                                                                                                                                                                                                                                                                                                                   |
| Funding                           | 4       | This study was supported by grants from the National Natural Science Foundation of China (3197070657) . (page 26,line 22)                                                                                                                                                                                                                                                                                                                                                                                                                                                                          |
| Roles and responsibilities        | 5a      | Ke Liu; Shanghai Punan Hospital of Pudong New District, Shanghai, China; Conceptualization, Methodology, SoftwarePriya. (page 26,line 30)                                                                                                                                                                                                                                                                                                                                                                                                                                                          |
|                                   | 5b      |                                                                                                                                                                                                                                                                                                                                                                                                                                                                                                                                                                                                    |
|                                   | 5c      |                                                                                                                                                                                                                                                                                                                                                                                                                                                                                                                                                                                                    |
|                                   | 5d      | Lan-Lan Zhang: Writing- Reviewing and Editing. Jian Zhang: Visualization, Investigation. Jia-Ning Wei: Data curation, Writing- Original draft preparation. (page 26,line 30)                                                                                                                                                                                                                                                                                                                                                                                                                       |
| <b>Introduction</b>               |         |                                                                                                                                                                                                                                                                                                                                                                                                                                                                                                                                                                                                    |
| Background and rationale          | 6a      | As people age, they are more likely to experience a decline in their response inhibition ability, which interferes with daily life. Previous studies have shown that exercise intervention can improve the cognitive ability of the elderly, but research on open- and closed-chain exercises to improve the response inhibition in this age group is still limited. This study will explore the advantages of long-term intervention of table tennis (open-chain exercise) compared with fit aerobics (closed-chain exercise) on the response inhibitory ability of the elderly. (page 8,line 17) |

1  
2  
3  
4  
5  
6  
7  
8  
9  
10  
11  
12  
13  
14  
15  
16  
17  
18  
19  
20  
21  
22  
23  
24  
25  
26  
27  
28  
29  
30  
31  
32  
33  
34  
35  
36  
37  
38  
39  
40  
41  
42  
43  
44  
45  
46  
47  
48  
49  
50  
51  
52  
53  
54  
55  
56  
57  
58  
59  
60

- 6b The elderly who choose not to exercise as the control group can compare the effects of exercise intervention with the intervention group. (page 15,line 21)
- Objectives 7 We hypothesized that different types of exercise intervention can affect the response inhibitory ability to varying degrees and that the effect of open-chain exercises is better. (page 11,line 58)
- Trial design 8 This study protocol of a pilot study is designed as a prospective, single-blind randomized controlled trial. Eligible participants will be randomized into table tennis, fit aerobics, or control groups at a 1:1:1 ratio. The duration of exercise intervention will be 6 months. The cognitive function test (questionnaire and behavioral task) will be conducted before the intervention as well as at 3 months, 6 months, and 12 months after the intervention. Participants who meet the criteria will undergo baseline assessments. All evaluations will be done at baseline and immediately after the exercise intervention. (page 12,line 17)

### Methods: Participants, interventions, and outcomes

- Study setting 9 School of Psychology, Shanghai University of Sport, Shanghai, China (page 15,line 21)
- Eligibility criteria 10 Any participants with heart disease, neurological disorder, musculoskeletal disorders, and other conditions not suitable for physical activity, contraindications to fMRI or TMS will be excluded. In addition, those with a regular exercise routine will be excluded. All participants will be between the ages of 60 and 70 years old and right-handed as assessed by the Edinburgh Handedness Inventory. Moreover, they must have their own residence. (page 12,line 53)
- Interventions 11a Table 2 Exercise intervention TIDieR (page 15,line 20)
- 11b Table 2 Exercise intervention TIDieR (page 15,line 20)
- 11c Table 2 Exercise intervention TIDieR (page 15,line 20)
- 11d Table 2 Exercise intervention TIDieR (page 15,line 20)

|                                                                                     |                      |    |                                                                                                                                                                                                                                                                                                                                                                                                                                                                                                                                                                                                                                                                                                                                                                                              |
|-------------------------------------------------------------------------------------|----------------------|----|----------------------------------------------------------------------------------------------------------------------------------------------------------------------------------------------------------------------------------------------------------------------------------------------------------------------------------------------------------------------------------------------------------------------------------------------------------------------------------------------------------------------------------------------------------------------------------------------------------------------------------------------------------------------------------------------------------------------------------------------------------------------------------------------|
| 1<br>2<br>3<br>4<br>5<br>6<br>7<br>8<br>9<br>10<br>11<br>12<br>13<br>14<br>15<br>16 | Outcomes             | 12 | Primary outcome : Behavioral task (RT,ACC) Secondary outcome measures will include the following: (1) Montreal Cognitive Assessment (MoCA); (2) BDI-II; (3) MMSE; (4) Stroop task testing; (5) n-back task testing; and (6) task-switch task testing (Table 3). The process of inhibitory control is the process of inhibition, refresh, and switching of the response task through cognitive function, so we will test the abilities of inhibition, refresh, and switching in the cognitive process of the elderly with different exercise types before and after the intervention by the Stroop task, the n-back task, and the task-switch task to compare their response inhibitory ability. The details of each outcome and instrument will be compiled as in Table 3. (page 19,line 45) |
| 17<br>18<br>19<br>20<br>21<br>22<br>23<br>24<br>25<br>26<br>27<br>28<br>29          | Participant timeline | 13 | This study protocol of a pilot study is designed as a prospective, single-blind randomized controlled trial. Eligible participants will be randomized into table tennis, fit aerobics, or control groups at a 1:1:1 ratio. The duration of exercise intervention will be 6 months. The cognitive function test (questionnaire and behavioral task) will be conducted before the intervention as well as at 3 months, 6 months, and 12 months after the intervention. Participants who meet the criteria will undergo baseline assessments. All evaluations will be done at baseline and immediately after the exercise intervention (See Figure 1). (page 12,line 17)                                                                                                                        |
| 30<br>31<br>32<br>33<br>34<br>35<br>36<br>37<br>38<br>39                            | Sample size          | 14 | From our previous studies on the modulation of SST performance,we expected an effect of $r = 0.4$ . Together with an $\alpha$ -value of 0.05 and a power of $1 - \beta = 0.9$ , a sample of at least 72 participants (24/group) was planned to find a similar effect. Calculations were carried out using G*Power, version 3.1, with anticipation of a 20% attrition rate. Therefore, we plan to recruit 90 subjects (30/group). (page 14,line 13)                                                                                                                                                                                                                                                                                                                                           |
| 40<br>41<br>42<br>43<br>44                                                          | Recruitment          | 15 | All participants were recruited and counted through the School of Psychology, Shanghai Sport University, and intervened in Shanghai Sport University. (page 15,line 20)                                                                                                                                                                                                                                                                                                                                                                                                                                                                                                                                                                                                                      |

#### **Methods: Assignment of interventions (for controlled trials)**

##### Allocation:

|                                                                            |                     |     |                                                                                                                                                                                                                                                                                                                                                                                                                                                    |
|----------------------------------------------------------------------------|---------------------|-----|----------------------------------------------------------------------------------------------------------------------------------------------------------------------------------------------------------------------------------------------------------------------------------------------------------------------------------------------------------------------------------------------------------------------------------------------------|
| 48<br>49<br>50<br>51<br>52<br>53<br>54<br>55<br>56<br>57<br>58<br>59<br>60 | Sequence generation | 16a | Eligible participants will be randomized into table tennis, fit aerobics, or control groups at a 1:1:1 ratio after consenting and baseline assessment.I will use The Excel software to code the subjects in 1-90 according to the recruitment time, and then use the formula '=RAND()' to generate the corresponding random sequence. By sorting the random sequence and then grouping it, 90 subjects will be randomly grouped. (page 14,line 29) |
|----------------------------------------------------------------------------|---------------------|-----|----------------------------------------------------------------------------------------------------------------------------------------------------------------------------------------------------------------------------------------------------------------------------------------------------------------------------------------------------------------------------------------------------------------------------------------------------|

|    |                |     |                                                                           |
|----|----------------|-----|---------------------------------------------------------------------------|
| 1  |                |     |                                                                           |
| 2  | Allocation     | 16b | Eligible participants will be randomized into table tennis, fit aerobics, |
| 3  | concealment    |     | or control groups at a 1:1:1 ratio after consenting and baseline          |
| 4  | mechanism      |     | assessment. I will use The Excel software to code the subjects in 1-90    |
| 5  |                |     | according to the recruitment time, and then use the formula '=RAND()'     |
| 6  |                |     | to generate the corresponding random sequence. By sorting the             |
| 7  |                |     | random sequence and then grouping it, 90 subjects will be randomly        |
| 8  |                |     | grouped. (page 14,line 29)                                                |
| 9  |                |     |                                                                           |
| 10 |                |     |                                                                           |
| 11 | Implementation | 16c | Ke Liu will generate the allocation sequence, Jian Zhang will enrol       |
| 12 |                |     | participants, and Jian Zhang will assign participants to interventions.   |
| 13 |                |     |                                                                           |
| 14 | Blinding       | 17a | The data is analyzed by specialized PhD students, they analyse the        |
| 15 | (masking)      |     | data be blind to group allocation. (page 23,line 48)                      |
| 16 |                |     |                                                                           |
| 17 |                | 17b | After the results are processed, the grouping can be announced.           |
| 18 |                |     |                                                                           |
| 19 |                |     |                                                                           |

### Methods: Data collection, management, and analysis

|    |                 |     |                                                                            |
|----|-----------------|-----|----------------------------------------------------------------------------|
| 20 |                 |     |                                                                            |
| 21 | Data collection | 18a | In order to ensure no inter-group differences in all test indicators after |
| 22 | methods         |     | random grouping, Independent-sample T test will be performed on            |
| 23 |                 |     | each pretest data after random grouping. Repeated-measures                 |
| 24 |                 |     | analysis of variance will be used to determine the effects of different    |
| 25 |                 |     | types of exercise (open, closed, or control) on the primary outcomes       |
| 26 |                 |     | (GoRT, SRRT, SSD, and SSRT) as well as on the secondary                    |
| 27 |                 |     | outcomes (MOCA score, BDI-II score, MMSE score, Stroop response            |
| 28 |                 |     | time, n-back accuracy, task-switch accuracy), with group and time          |
| 29 |                 |     | serving as factors. (page 23,line 32)                                      |
| 30 |                 |     |                                                                            |
| 31 |                 |     |                                                                            |
| 32 |                 |     |                                                                            |
| 33 |                 | 18b | Feedback will be given to each participant on a regular basis,             |
| 34 |                 |     | including their physical and psychological data, as well as their motor    |
| 35 |                 |     | skills learning performance. Keep them up to date on their progress        |
| 36 |                 |     | and status to keep them engaged. (page 17,line 17)                         |
| 37 |                 |     |                                                                            |
| 38 |                 |     |                                                                            |
| 39 | Data            | 19  | The data is analyzed by specialized PhD students. (page 23,line            |
| 40 | management      |     | 48)                                                                        |
| 41 |                 |     |                                                                            |
| 42 | Statistical     | 20a | Repeated-measures analysis of variance will be used to determine the       |
| 43 | methods         |     | effects of different types of exercise (open, closed, or control) on the   |
| 44 |                 |     | primary outcomes (GoRT, SRRT, SSD, and SSRT) as well as on the             |
| 45 |                 |     | secondary outcomes (MOCA score, BDI-II score, MMSE score,                  |
| 46 |                 |     | Stroop response time, n-back accuracy, task-switch accuracy), with         |
| 47 |                 |     | group and time serving as factors. (page 23,line 38)                       |
| 48 |                 |     |                                                                            |
| 49 |                 |     |                                                                            |
| 50 |                 | 20b | No                                                                         |
| 51 |                 |     |                                                                            |
| 52 |                 | 20c | The data is analyzed by specialized PhD students, they analyse the         |
| 53 |                 |     | data be blind to group allocation. (page 23,line 48)                       |
| 54 |                 |     |                                                                            |
| 55 |                 |     |                                                                            |

### Methods: Monitoring

|    |                 |     |                                                                    |
|----|-----------------|-----|--------------------------------------------------------------------|
| 56 |                 |     |                                                                    |
| 57 | Data monitoring | 21a | The data is analyzed by specialized PhD students, they analyse the |
| 58 |                 |     | data be blind to group allocation. (page 23,line 48)               |
| 59 |                 |     |                                                                    |
| 60 |                 |     |                                                                    |



|          |     |                                                                                                                                               |
|----------|-----|-----------------------------------------------------------------------------------------------------------------------------------------------|
|          | 21b | The initiator of the experiment, Professor Zhang will have access to these interim results and make the final decision to terminate the trial |
| Harms    | 22  | In the Participants gave an informed consent form.                                                                                            |
| Auditing | 23  | In the Participants gave an informed consent form.                                                                                            |

### Ethics and dissemination

|                               |     |                                                                                                                                                                                                                                                                        |
|-------------------------------|-----|------------------------------------------------------------------------------------------------------------------------------------------------------------------------------------------------------------------------------------------------------------------------|
| Research ethics approval      | 24  | This study was approved by the Shanghai University of Sport Research Ethics Committee (102772019RT012). (page 8,line 59)                                                                                                                                               |
| Protocol amendments           | 25  | Upload as attachment.                                                                                                                                                                                                                                                  |
| Consent or assent             | 26a | PhD students in charge of data collection will collect data within the cognitive function test (questionnaire and behavioral task) will be conducted before the intervention as well as at 3 months, 6 months, and 12 months after the intervention. (page 12,line 24) |
|                               | 26b | No                                                                                                                                                                                                                                                                     |
| Confidentiality               | 27  | Professor Zhang, who is in charge of recruitment, completes the participant information management.                                                                                                                                                                    |
| Declaration of interests      | 28  | The authors have no conflicts of interest to declare.                                                                                                                                                                                                                  |
| Access to data                | 29  | The result will be made public by the person in charge of the National Natural Science Foundation of China (3197070657)                                                                                                                                                |
| Ancillary and post-trial care | 30  | In the Participants gave an informed consent form.                                                                                                                                                                                                                     |
| Dissemination policy          | 31a | This study has been registered prospectively in the Chinese Clinical Trial Registry (ChiCTR2100043616, 23 February 2021).It will be published in accordance with the standards of the Chinese Clinical Trial Registry.                                                 |
|                               | 31b | It will be written in accordance with the standards of the Chinese Clinical Trial Registry.                                                                                                                                                                            |
|                               | 31c | It can be viewed in the Chinese Clinical Trial Registry.                                                                                                                                                                                                               |

### Appendices

|                            |    |                       |
|----------------------------|----|-----------------------|
| Informed consent materials | 32 | Upload as attachment. |
| Biological specimens       | 33 | No.                   |

---

\*It is strongly recommended that this checklist be read in conjunction with the SPIRIT 2013 Explanation & Elaboration for important clarification on the items. Amendments to the protocol should be tracked and dated. The SPIRIT checklist is copyrighted by the SPIRIT

1  
2  
3  
4  
5  
6  
7  
8  
9  
10  
11  
12  
13  
14  
15  
16  
17  
18  
19  
20  
21  
22  
23  
24  
25  
26  
27  
28  
29  
30  
31  
32  
33  
34  
35  
36  
37  
38  
39  
40  
41  
42  
43  
44  
45  
46  
47  
48  
49  
50  
51  
52  
53  
54  
55  
56  
57  
58  
59  
60

Group under the Creative Commons "[Attribution-NonCommercial-NoDerivs 3.0 Unported](#)" license.

For peer review only

# BMJ Open

## Comparison of open- and closed-chain exercises in improving the response inhibitory ability of the elderly: a protocol for a randomized controlled clinical trial

|                                 |                                                                                                                                                                                                                                                                                     |
|---------------------------------|-------------------------------------------------------------------------------------------------------------------------------------------------------------------------------------------------------------------------------------------------------------------------------------|
| Journal:                        | <i>BMJ Open</i>                                                                                                                                                                                                                                                                     |
| Manuscript ID                   | bmjopen-2021-051966.R2                                                                                                                                                                                                                                                              |
| Article Type:                   | Protocol                                                                                                                                                                                                                                                                            |
| Date Submitted by the Author:   | 21-Oct-2021                                                                                                                                                                                                                                                                         |
| Complete List of Authors:       | ke, liu; Shanghai Punan Hospital of Pudong New District<br>lanlan, zhang; Guangzhou Sport University, School of Leisure Sport and Management<br>jian, zhang; Shanghai University of Sport, School of Psychology<br>jianing, wei; Shanghai University of Sport, School of Psychology |
| <b>Primary Subject Heading</b>: | Public health                                                                                                                                                                                                                                                                       |
| Secondary Subject Heading:      | Mental health, Public health                                                                                                                                                                                                                                                        |
| Keywords:                       | Old age psychiatry < PSYCHIATRY, MENTAL HEALTH, Biophysics < NATURAL SCIENCE DISCIPLINES, PUBLIC HEALTH                                                                                                                                                                             |
|                                 |                                                                                                                                                                                                                                                                                     |

SCHOLARONE™  
Manuscripts

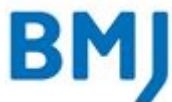

I, the Submitting Author has the right to grant and does grant on behalf of all authors of the Work (as defined in the below author licence), an exclusive licence and/or a non-exclusive licence for contributions from authors who are: i) UK Crown employees; ii) where BMJ has agreed a CC-BY licence shall apply, and/or iii) in accordance with the terms applicable for US Federal Government officers or employees acting as part of their official duties; on a worldwide, perpetual, irrevocable, royalty-free basis to BMJ Publishing Group Ltd ("BMJ") its licensees and where the relevant Journal is co-owned by BMJ to the co-owners of the Journal, to publish the Work in this journal and any other BMJ products and to exploit all rights, as set out in our [licence](#).

The Submitting Author accepts and understands that any supply made under these terms is made by BMJ to the Submitting Author unless you are acting as an employee on behalf of your employer or a postgraduate student of an affiliated institution which is paying any applicable article publishing charge ("APC") for Open Access articles. Where the Submitting Author wishes to make the Work available on an Open Access basis (and intends to pay the relevant APC), the terms of reuse of such Open Access shall be governed by a Creative Commons licence – details of these licences and which [Creative Commons](#) licence will apply to this Work are set out in our licence referred to above.

Other than as permitted in any relevant BMJ Author's Self Archiving Policies, I confirm this Work has not been accepted for publication elsewhere, is not being considered for publication elsewhere and does not duplicate material already published. I confirm all authors consent to publication of this Work and authorise the granting of this licence.

1  
2  
3  
4 **Title:** Comparison of open- and closed-chain exercises in improving the response  
5  
6 inhibitory ability of the elderly: a protocol for a randomized controlled clinical  
7  
8  
9 trial  
10

11 **Article Type:** Clinical Study Protocol  
12

13  
14 **Keywords:** Elder; Open-chain exercise; Closed-chain exercise; Response inhibitory  
15  
16 ability; Study protocol  
17  
18

19 **Corresponding Author:** Jia-Ning Wei  
20

21  
22 **Corresponding Author's Institution:** Shanghai University of Sport  
23

24  
25 **First Author:** Ke Liu, Lan-Lan Zhang  
26

27 **Order of Authors:** Jian Zhang  
28  
29

## 30 **Abstract**

31  
32 **Introduction** As people age, they are more likely to experience a decline in their  
33  
34 response inhibition ability, which interferes with daily life. Previous studies have  
35  
36 shown that exercise intervention can improve the cognitive ability of the elderly, but  
37  
38 research on open- and closed-chain exercises to improve the response inhibition in  
39  
40 this age group is still limited. This study will explore the advantages of long-term  
41  
42 intervention of table tennis (open-chain exercise) compared with fit aerobics  
43  
44 (closed-chain exercise) on the response inhibitory ability of the elderly.  
45  
46  
47  
48  
49

50 **Methods and analysis** A single-blind randomized controlled trial will be conducted.  
51  
52 A total of 90 elderly subjects will be recruited and allocated randomly to the  
53  
54 following groups: table tennis, fit aerobics, and control. The interventions for the table  
55  
56 tennis group and the fit aerobics group will be implemented in three 60-min sessions  
57  
58  
59  
60

1  
2  
3  
4 per week for 6 months; the control group will receive no exercise intervention. The  
5  
6 primary assessment will be behavioral indicators of response inhibitory ability in the  
7  
8 elderly based on the stop signal task (SST). The secondary outcomes will include  
9  
10 cognitive ability, mental status, and depression in the elderly. Assessments will be  
11  
12 conducted at baseline, 3 months, 6 months, and 12 months.  
13  
14  
15

16  
17 **Ethics and dissemination** This study was approved by the Shanghai University of  
18  
19 Sport Research Ethics Committee (102772019RT012) and will provide reference for  
20  
21 the advantages of table tennis compared with other types of sports in improving the  
22  
23 response inhibitory ability of the elderly. The results of this study will provide a  
24  
25 theoretical basis for choosing the best exercise program to improve the response  
26  
27 inhibitory ability of the elderly.  
28  
29  
30  
31

32  
33 **Trial registration number** This study has been registered prospectively in the  
34  
35 Chinese Clinical Trial Registry (ChiCTR2100043616, 23 February 2021)  
36  
37  
38  
39  
40  
41  
42  
43  
44  
45  
46  
47  
48  
49  
50  
51  
52  
53  
54  
55  
56  
57  
58  
59  
60

1  
2  
3  
4 **Title:** Comparison of open- and closed-chain exercises in improving the response  
5  
6 inhibitory ability of the elderly: a protocol for a randomized controlled clinical trial  
7  
8  
9

10  
11  
12 **Type of Manuscript:** Clinical Study Protocol  
13

14 **Authors:** Ke Liu<sup>1†</sup>, Lan-Lan Zhang<sup>2†</sup>, Jian Zhang<sup>3</sup>, Jia-Ning Wei<sup>3\*</sup>  
15  
16

17  
18  
19 **Affiliation:**  
20

21  
22 <sup>1</sup> Shanghai Punan Hospital of Pudong New District, Shanghai, China  
23

24 <sup>2</sup> School of Leisure Sport and Management, Guangzhou Sport University,  
25  
26 Guangzhou, China  
27  
28

29  
30 <sup>3</sup> School of Psychology, Shanghai University of Sport, Shanghai, China  
31

32 <sup>†</sup> These authors contributed equally to this work.  
33  
34

35  
36  
37 **Figures and tables:** 3 figures and 3 tables  
38

39  
40 **Number of Words:** Abstract: 264 words; Manuscript: 4,177 words; 27 pages  
41  
42

43  
44  
45 **\* Corresponding author:**  
46

47  
48 Jia-Ning Wei  
49

50  
51 School of Psychology  
52

53  
54 Shanghai University of Sport  
55

56  
57 650 Qing Yuan Huan Road, Shanghai, China, 200438  
58

59  
60 E-mail: [2011916006@sus.edu.cn](mailto:2011916006@sus.edu.cn)

**Abbreviations**

SST, Stop signal task

SSRT, stop signal response time

SSD, stop signal delay

MoCA, Montreal Cognitive Assessment

BDI-II, Beck Depression Inventory (2nd edition);

MMSE, Mini Mental State Examination



1  
2  
3  
4 Comparison of open- and closed-chain exercises in improving the  
5  
6 response inhibitory ability of the elderly: a protocol for a  
7  
8 randomized controlled clinical trial  
9  
10  
11  
12  
13

14 **Abstract**

15  
16  
17 **Introduction** As people age, they are more likely to experience a decline in their  
18  
19 response inhibition ability, which interferes with daily life. Previous studies have  
20  
21 shown that exercise intervention can improve the cognitive ability of the elderly, but  
22  
23 research on open- and closed-chain exercises to improve the response inhibition in  
24  
25 this age group is still limited. This study will explore the advantages of long-term  
26  
27 intervention of table tennis (open-chain exercise) compared with fit aerobics  
28  
29 (closed-chain exercise) on the response inhibitory ability of the elderly.  
30  
31  
32  
33

34  
35 **Methods and analysis** A single-blind randomized controlled trial will be conducted.  
36  
37 A total of 90 elderly subjects will be recruited and allocated randomly to the  
38  
39 following groups: table tennis, fit aerobics, and control. The interventions for the table  
40  
41 tennis group and the fit aerobics group will be implemented in three 60-min sessions  
42  
43 per week for 6 months; the control group will receive no exercise intervention. The  
44  
45 primary assessment will be behavioral indicators of response inhibitory ability in the  
46  
47 elderly based on the stop signal task (SST). The secondary outcomes will include  
48  
49 cognitive ability, mental status, and depression in the elderly. Assessments will be  
50  
51 conducted at baseline, 3 months, 6 months, and 12 months.  
52  
53  
54  
55  
56  
57

58 **Ethics and dissemination** This study was approved by the Shanghai University of  
59  
60

1  
2  
3  
4 Sport Research Ethics Committee (102772019RT012) and will provide reference for  
5  
6 the advantages of table tennis compared with other types of sports in improving the  
7  
8 response inhibitory ability of the elderly. The results of this study will provide a  
9  
10 theoretical basis for choosing the best exercise program to improve the response  
11  
12 inhibitory ability of the elderly.  
13  
14

15  
16  
17 **Trial registration number** This study has been registered prospectively in the  
18  
19 Chinese Clinical Trial Registry (ChiCTR2100043616, 23 February 2021).  
20  
21

### 22 **Strengths and limitations of this study**

- 23  
24  
25 1. Because it is a sports intervention, the safety of the elderly during exercise is worth  
26  
27 worrying about.  
28  
29  
30 2. How to select and control participants in a longitudinal study is one of the  
31  
32 difficulties of this project.  
33  
34  
35 3. The patients will come from one geographic area which limits the generalisability.  
36  
37  
38  
39

### 40 **Introduction**

41  
42 Response inhibition ability is a type of cognitive control ability that can achieve  
43  
44 behavioral goals by adjusting perception and motor function in the changing  
45  
46 environment as well as be used to solve conflicts.<sup>[1]</sup> As people age, they are likely to  
47  
48 experience a decline in their response inhibition ability,<sup>[2-5]</sup> which can interfere with  
49  
50 daily life and even the ability to live independently. Although some studies have  
51  
52 shown that exercise intervention can improve the cognitive ability of the elderly,<sup>[6]</sup>  
53  
54 there are few studies on the effect of exercise intervention on reactive inhibition  
55  
56  
57  
58  
59  
60

1  
2  
3  
4 ability. In particular, research on the different types of exercise to improve the  
5  
6 response inhibition ability of the elderly is still limited.  
7

8  
9 Sports can be divided into closed kinetic chain activities and open kinetic  
10  
11 chain activities.<sup>[7]</sup> It is different from Open kinetic chain exercise (OKCE) and closed  
12  
13 kinetic chain exercise (CKCE) in exercise prescription.<sup>[8]</sup> The open and closed  
14  
15 mentioned here refer to the movement environment and movement methods, not the  
16  
17 fixed point of the extremity during movements. The operating environment of  
18  
19 closed-chain exercises, such as fit aerobics, fitness running, etc., is stable; and the  
20  
21 operating state is determined by the operator. In contrast, the operating environment  
22  
23 of open-chain exercises, including those involved in the sports of table tennis,  
24  
25 basketball, etc., is unstable; and the operation state is determined by external  
26  
27 conditions, such as a ball and opponents. In open-chain exercises, the participant must  
28  
29 continuously adjust their behavior to unpredictable stimuli and must invest more  
30  
31 cognitive resources in the decision-making process. Previous studies have shown that  
32  
33 open-chain exercises require more regulating capacity than closed-chain exercises.<sup>[9]</sup>  
34  
35 First, a study comparing the cognitive control of sports involving open-chain  
36  
37 exercises with that of closed-chain exercises has revealed that athletes engaging in  
38  
39 open-chain exercises have an advantage in cognitive control. It has been demonstrated  
40  
41 that intervention with long-term open-chain exercise can improve cognitive function  
42  
43 better than closed-chain exercise,<sup>[10]</sup> but whether it can improve response inhibitory  
44  
45 ability better is not clear.  
46  
47  
48  
49  
50  
51  
52  
53  
54  
55  
56  
57

58 As one of the classical paradigms to test response inhibition, the stop signal  
59  
60

1  
2  
3  
4 task (SST) tests the complete suppression of an ongoing action. The SST instructs the  
5  
6 participant to perform a response when the go signal appears, but after a few go  
7  
8 signals appear, a stop signal will appear at a specific time interval, and the individual  
9  
10 will be asked to stop the response as far as possible.<sup>[11]</sup> The strengths of this test are  
11  
12 that a stop signal to evoke controlling behavior is administered after a go signal is  
13  
14 used, and the interval between these two signals dynamically changes regularly.<sup>[12]</sup> In  
15  
16 addition, the SST is capable of quantizing inhibitory control behavior. However, no  
17  
18 response occurs when the participant holds up successfully. The stop signal response  
19  
20 time (SSRT) is a more sensitive indicator to evaluate the response inhibitory  
21  
22 ability.<sup>[13]</sup> In short, to calculate the SSRT, all go-reactions (i.e., go-trials in which the  
23  
24 response was missed) are rank-ordered and assigned the maximum response time in  
25  
26 order to compensate for the lacking response. Afterwards, the most recent stop signal  
27  
28 delay (SSD) is subtracted from the response time corresponding to the stop-signal  
29  
30 response percentile. The resulting value is termed the SSRT.<sup>[14,15]</sup> These results can be  
31  
32 used as an important index to evaluate the response inhibitory ability.  
33  
34  
35  
36  
37  
38  
39  
40  
41  
42

43 The proposed randomized clinical trial will examine the effects of table tennis  
44  
45 (open-chain exercise) and fit aerobics (closed-chain exercise) on the primary outcome  
46  
47 (behavioral task) of response inhibitory ability as well as on the secondary outcomes  
48  
49 of cognitive ability, mental status, and depression in the elderly. We hypothesized that  
50  
51 different types of exercise intervention can affect the response inhibitory ability to  
52  
53 varying degrees and that the effect of open-chain exercises is better.  
54  
55  
56  
57  
58  
59  
60

## Methods

### Study design

This study protocol of a study is designed as a prospective, single-blind randomized controlled trial. Eligible participants will be randomized into table tennis, fit aerobics, or control groups at a 1:1:1 ratio. The duration of exercise intervention will be 6 months. The cognitive function test (questionnaire and behavioral task) will be conducted before the intervention as well as at 3 months, 6 months, and 12 months after the intervention. Participants who meet the criteria will undergo baseline assessments. All evaluations will be done at baseline and immediately after the exercise intervention (See Figure 1). We will recruit healthy right-handed elderly participants with normal or corrected-to-normal vision and without a history of neurological diseases in the same way. The study is scheduled to begin in August 2021 and continue until August 2023.

Figure 1 Flow diagram of the study design

### Participants

Any participants with heart disease, neurological disorder, musculoskeletal disorders, and other conditions not suitable for physical activity, contraindications to fMRI or TMS will be excluded. In addition, those with a regular exercise routine will be excluded. All participants will be between the ages of 60 and 70 years old and right-handed as assessed by the Edinburgh Handedness Inventory. Moreover, they must have their own residence.

1  
2  
3  
4 Before and after the intervention, all groups will have their demographics  
5  
6 statistically analyzed for factors such as health status, physical fitness, and cognitive  
7  
8 function (Table 1). Intergroup differences will be minimized before the intervention.  
9  
10  
11  
12  
13

14 Table 1 Demographic and clinical characteristics of the study participants  
15

|    | Open group | Closed group | Control |
|----|------------|--------------|---------|
| 16 |            |              |         |
| 17 |            |              |         |
| 18 |            |              |         |
| 19 |            |              |         |
| 20 |            |              |         |
| 21 |            |              |         |
| 22 |            |              |         |
| 23 |            |              |         |
| 24 |            |              |         |
| 25 |            |              |         |
| 26 |            |              |         |
| 27 |            |              |         |
| 28 |            |              |         |
| 29 |            |              |         |
| 30 |            |              |         |
| 31 |            |              |         |
| 32 |            |              |         |
| 33 |            |              |         |
| 34 |            |              |         |
| 35 |            |              |         |
| 36 |            |              |         |
| 37 |            |              |         |
| 38 |            |              |         |
| 39 |            |              |         |
| 40 |            |              |         |
| 41 |            |              |         |
| 42 |            |              |         |
| 43 |            |              |         |
| 44 |            |              |         |
| 45 |            |              |         |
| 46 |            |              |         |
| 47 |            |              |         |

48 MoCA, Montreal Cognitive Assessment; BDI-II, Beck Depression Inventory (2nd edition); MMSE, Mini Mental  
49  
50 State Examination; Behavioral tests for cognitive ability: Stroop task testing, n-back task testing, task-switch task  
51  
52 testing; RT, response time; ACC, accuracy.  
53  
54  
55  
56  
57

## 58 Sample size

1  
2  
3  
4 From our previous studies on the modulation of SST performance,<sup>[16,17]</sup> we expected  
5  
6 an effect of  $r = 0.4$ . Together with an  $\alpha$ -value of 0.05 and a power of  $1 - \beta = 0.9$ , a  
7  
8 sample of at least 72 participants (24/group) was planned to find a similar effect.  
9  
10 Calculations were carried out using G\*Power, version 3.1,<sup>[18]</sup> with anticipation of a  
11  
12 20% attrition rate. Therefore, we plan to recruit 90 subjects (30/group).  
13  
14  
15  
16  
17

## 18 **Randomisation**

19  
20 Eligible participants will be randomized into table tennis, fit aerobics, or control  
21  
22 groups at a 1:1:1 ratio after consenting and baseline assessment. We will use The  
23  
24 Excel software to code the subjects in 1-90 according to the recruitment time, and  
25  
26 then use the formula '=RAND()' to generate the corresponding random sequence. By  
27  
28 sorting the random sequence and then grouping it, 90 subjects will be randomly  
29  
30 grouped. The above tasks will be completed by professional computer workers after  
31  
32 the participants are recruited. They are double-blind with recruitment and grouping.  
33  
34  
35  
36  
37  
38  
39  
40

## 41 **Exercise intervention**

42  
43  
44 The exercise intervention will last for 6 months. The participants will be divided into  
45  
46 three groups: table tennis, fit aerobics, and control. The table tennis (open-chain) and  
47  
48 fit aerobics (closed-chain) groups will train for 60 min, three times a week. The  
49  
50 exercise intensity will be monitored, ensuring that the heart rate remains in the range  
51  
52 of 60–70% of the maximum heart rate ( $HR_{MAX} = 220 - \text{age}$ ). During the training  
53  
54 period, the exercise intensity will be monitored by the experimenter through real-time  
55  
56  
57  
58  
59  
60

heart rate monitoring and the subject's subjective reaction. The exercise load and heart rate responses of the subjects will be recorded at each training session and adjusted accordingly with an increase of aerobic capacity. All the participants are not used to regular exercise before participating in the experiment. The control group just needs to maintain their old habits, and we will visit the control group regularly to evaluate their physical activity, so as to ensure that their physical activity does not meet the exercise standards. The entire intervention process will be monitored in real time by health care professionals. We will have coaches to monitor and record their attendance, and if they are absent, they will supplement the training at other times. Specific intervention methods are shown in Table 2.

Table 2 Exercise intervention TIDieR

| Item NO | Brief name        | Group                                                                                                                                                                             |                                                                                                      |                                                                                                                                                                                                                               |
|---------|-------------------|-----------------------------------------------------------------------------------------------------------------------------------------------------------------------------------|------------------------------------------------------------------------------------------------------|-------------------------------------------------------------------------------------------------------------------------------------------------------------------------------------------------------------------------------|
|         |                   | Table tennis group                                                                                                                                                                | Fit aerobics group                                                                                   | Control group                                                                                                                                                                                                                 |
| 1       | Why               | Table tennis                                                                                                                                                                      | Fit aerobics                                                                                         | Control                                                                                                                                                                                                                       |
| 2       | What              | Participants will be led by professional table tennis coaches for 6 months of table tennis exercise.                                                                              | Participants will be led by professional fit aerobics coaches for 6 months of fit aerobics exercise. | Keep the original living habits, do not have regular exercise, regularly attend health lectures and accept telephone follow-up. Participants will attend biweekly health talks and will be interviewed by phone once a month. |
| 3       | What (materials)  | Participants will do 60 minutes of exercise three times a week. Specific exercises will be described later.                                                                       |                                                                                                      |                                                                                                                                                                                                                               |
| 4       | What (procedures) | Each participant received a test report before and at 3, 6, and 12 months after the start of the exercise so that they could understand their physical and psychological changes. |                                                                                                      |                                                                                                                                                                                                                               |



|    |          |                                                                        |                                     |                         |
|----|----------|------------------------------------------------------------------------|-------------------------------------|-------------------------|
| 1  |          |                                                                        |                                     |                         |
| 2  |          |                                                                        |                                     |                         |
| 3  |          |                                                                        |                                     |                         |
| 4  |          |                                                                        |                                     | The health lecture was  |
| 5  |          | Table tennis coaches is the                                            |                                     | completed by ph. D.     |
| 6  |          | second level table tennis                                              | Fit aerobics coaches is the second  | students majoring in    |
| 7  |          | athlete in China from                                                  | level fit aerobics athlete in China | physical Education      |
| 8  |          | Shanghai University of                                                 | from Shanghai University of         | and training in         |
| 9  |          | Sport. The psychology-related                                          | Sport. The psychology-related       | Shanghai University     |
| 10 | 5        | tests were completed by ph. D.                                         | tests were completed by ph. D.      | of Sport, and the       |
| 11 | Who      | students majoring in                                                   | students majoring in psychology     | telephone return visit  |
| 12 | provided | psychology at Shanghai                                                 | at Shanghai University of Sport.    | was completed by ph.    |
| 13 |          | University of Sport.                                                   |                                     | D. students majoring    |
| 14 |          |                                                                        |                                     | in psychology.          |
| 15 |          |                                                                        |                                     | Health lectures will be |
| 16 |          |                                                                        |                                     | conducted face to face  |
| 17 |          |                                                                        |                                     | in a group format, and  |
| 18 |          |                                                                        |                                     | telephone return visits |
| 19 |          |                                                                        |                                     | will be conducted one   |
| 20 |          |                                                                        |                                     | by one.                 |
| 21 | 6        | The exercise intervention will take place in a stationary gym, where   |                                     |                         |
| 22 | How      | the instructor will direct the whole group face to face.               |                                     |                         |
| 23 |          |                                                                        |                                     |                         |
| 24 |          |                                                                        |                                     |                         |
| 25 |          |                                                                        |                                     |                         |
| 26 |          | Table tennis training is held in                                       | Fit aerobic training is conducted   | The health lecture will |
| 27 |          | China Table Tennis College of                                          | in the School of Physical           | be held in the          |
| 28 |          | Shanghai Sport                                                         | Education and Training of           | conference room of      |
| 29 | 7        | University. There is a                                                 | Shanghai Sport University. There    | school of Psychology,   |
| 30 | Where    | professional table tennis                                              | is a professional aerobics training | Shanghai University     |
| 31 |          | training ground.                                                       | ground.                             | of Sport.               |
| 32 |          |                                                                        |                                     |                         |
| 33 |          |                                                                        |                                     |                         |
| 34 |          | The table tennis (open-chain) and fit aerobics (closed-chain) groups   |                                     |                         |
| 35 |          | will train for 60 min, three times a week. The exercise intensity will |                                     |                         |
| 36 |          | be monitored, ensuring that the heart rate remains in the range of     |                                     |                         |
| 37 |          | 60–70% of the maximum heart rate (HRMAX = 220 – age).                  |                                     |                         |
| 38 |          |                                                                        |                                     |                         |
| 39 |          |                                                                        |                                     |                         |
| 40 |          | Each session will consist of a                                         | The participants in the             |                         |
| 41 |          | warm-up for 10 min, table                                              | closed-chain exercise group will    |                         |
| 42 |          | tennis practice under the                                              | attend a supervised fit aerobics    |                         |
| 43 |          | guidance of a coach for 40                                             | class of the same frequency,        | Fortnightly health      |
| 44 |          | min, and relaxation for 10                                             | duration, and length as the         | lectures of 30-50       |
| 45 | 8        | min. The degree of difficulty                                          | open-chain exercise group. Fit      | minutes will be held.   |
| 46 | When     | of training throughout the                                             | aerobics at 50–60% of the           |                         |
| 47 | and how  | program will be gradually                                              | maximum heart rate for the first    | A 10-minute return      |
| 48 | much     | increased. Table tennis at 50–                                         | two weeks, followed by 60–70%       | call once a month.      |
| 49 |          | 60% of the maximum heart                                               | of the maximum heart rate. Each     |                         |
| 50 |          | rate for the first two weeks,                                          | fit aerobics class will consist of  |                         |
| 51 |          | followed by 60–70% of the                                              | warm-up activities for 10 min,      |                         |
| 52 |          | maximum heart rate. The                                                | basic aerobics activities for 40    |                         |
| 53 |          | training will consist of the                                           | min., and relaxation and            |                         |
| 54 |          | following seven main parts:                                            | stretching for 10 min. The fit      |                         |
| 55 |          | (1) footwork; (2) the serve; (3)                                       | aerobics training will involve the  |                         |
| 56 |          |                                                                        |                                     |                         |
| 57 |          |                                                                        |                                     |                         |
| 58 |          |                                                                        |                                     |                         |
| 59 |          |                                                                        |                                     |                         |
| 60 |          |                                                                        |                                     |                         |

---

forehand backhand attack; (4) following: 1) jogging, rope  
 forehand backhand loop; (5) skipping, and/or gymnastics to  
 kill shot; (6) continuous hitting warm up and achieve a slightly  
 of directional or sweating body, and the heart rate  
 nondirectional balls randomly will be slightly faster; 2)  
 sent by the server; and (7) stepping, side parallel step, side  
 comprehensive practice. All cross step, jumping jacks,  
 the technical movements will lunging, kicking, and so on.  
 be from simple to complex. Following the rhythm of the  
 music, each action will be  
 reduced from four sets to two sets  
 and then to one set; 3) relax the  
 shoulder, elbow, hip, and knee  
 joints by doing a few stretches to  
 help relax the muscles.

Exercise interventions were performed at 50-60% of maximum  
 heart rate for the first two weeks, followed by 60-70% of maximum  
 9 Tailoring: heart rate. In order to ensure the safety of participants, the exercise  
 intensity will be gradually increased, and the first two weeks will be  
 mainly acclimatization.

How Feedback will be given to each participant on a regular basis, including their physical and  
 10 well psychological data, as well as their motor skills learning performance. Keep them up to date  
 (planned) on their progress and status to keep them engaged.

---

### *SST protocol*

The SST was programmed using E-prime 2, in which the subjects will be asked to  
 press a "←" button or a "→" button according to the left and right arrow directions. In  
 25% of the trials, the arrow will turn red and a gray triangle will appear; the  
 participants will press the button to stop or give no response. The interval of  
 stimulation will be dynamically adjusted according to the tracking procedure. The  
 task will be divided into four groups of 120 trials each. The task flow is shown in  
 Figure 2. The execution go signal reaction time (GoRT), stop response reaction time

1  
2  
3  
4 (SRRT), SSD, and SSRT will be investigated. GoRT is how long it takes for the  
5  
6 participant to respond after the GO (black arrow) appears. SRRT is the time to respond  
7  
8 to the stop signal (arrow turning red) task. SSD is the time between the task stimulus  
9  
10 and the stop signal.  
11  
12  
13  
14  
15  
16  
17  
18  
19  
20  
21  
22

FOR  
Figure 2 Stop signal task flow chart

23 The instructions for the experiment will be follows: Welcome to the  
24  
25 experiment. First, "+" will appear in the center of the screen to alert the user to begin  
26  
27 the keystroke reaction, and the right index finger should be placed on the "↓" to  
28  
29 prepare for the experiment. When the black arrow appears in the center of the screen,  
30  
31 use your right index finger to press the button. When the left arrow appears, use your  
32  
33 index finger to press the "←" key on the keyboard. When the right arrow appears, use  
34  
35 your index finger to press the "→" key on the keyboard. After each key response, the  
36  
37 right index finger should quickly return to the "↓" key to wait for the next response.  
38  
39 When the black arrow in the center of the screen turns red and a small gray triangle  
40  
41 appears, please stop the keystroke reaction immediately. When the red arrow appears  
42  
43 in the center of the screen, please do not perform any keystroke reaction. Let's move  
44  
45 on to practice.  
46  
47  
48  
49  
50  
51  
52  
53  
54  
55  
56  
57

## 58 **Outcomes**

59  
60

## Primary outcome

### *Behavioral task*

The task will include randomly interspersed no-go and stop-signal trials, which will enable us to examine both types of inhibition. A total of 480 trials will be performed, including 75% go trials and 25% stop trials. On go trials, the subjects will respond to a left/right black arrow (1000 ms) by pressing the buttons with their right hand. Responses will be made with the index finger (for the left or right arrow). In the stop-signal trials, a response will be initially cued by a left/right black arrow, but the arrow color will change to red concurrent with a gray triangle after a SSD, and the subjects will be asked not to respond. The SSD will be varied from trial to trial by using a step-up/down algorithm with an initial estimate of 250 ms to maintain 50% successful inhibition. The task flow chart is shown in Figure 3.

Figure 3 Stop behavioral task

The task will consist of randomly interspersed no-go and stop-signal trials. A total of 480 trials will be performed (75% go, 25% stop).

## Secondary outcomes

Secondary outcome measures will include the following: (1) Montreal Cognitive Assessment (MoCA); (2) BDI-II; (3) MMSE; (4) Stroop task testing; (5) n-back task testing; and (6) task-switch task testing (Table 3). The process of inhibitory control is the process of inhibition, refresh, and switching of the response task through cognitive

function, so we will test the abilities of inhibition, refresh, and switching in the cognitive process of the elderly with different exercise types before and after the intervention by the Stroop task, the n-back task, and the task-switch task to compare their response inhibitory ability. The details of each outcome and instrument will be compiled as in Table 3.

Table 3 The differences among the three groups of subjects at various stages

| Group       | Baseline | 6 months | 12 months | 18 months | 24 months | F (P value) | F (P value)  | F (P value)        |
|-------------|----------|----------|-----------|-----------|-----------|-------------|--------------|--------------------|
|             |          |          |           |           |           | Time effect | Group effect | Interaction effect |
| MoCA        | Open     |          |           |           |           |             |              |                    |
|             | Closed   |          |           |           |           |             |              |                    |
|             | Control  |          |           |           |           |             |              |                    |
| BDI-II      | Open     |          |           |           |           |             |              |                    |
|             | Closed   |          |           |           |           |             |              |                    |
|             | Control  |          |           |           |           |             |              |                    |
| MMSE        | Open     |          |           |           |           |             |              |                    |
|             | Closed   |          |           |           |           |             |              |                    |
|             | Control  |          |           |           |           |             |              |                    |
| Stroop (RT) | Open     |          |           |           |           |             |              |                    |
|             | Closed   |          |           |           |           |             |              |                    |

---

|        |         |
|--------|---------|
|        | Control |
|        | Open    |
| n-back | Closed  |
| (ACC)  | Control |
| Task-  | Open    |
| switch | Closed  |
| (ACC)  | Control |

---

MoCA, Montreal Cognitive Assessment; BDI-II, Beck Depression Inventory (2nd edition); MMSE, Mini Mental

State Examination; RT, response time; ACC, accuracy.

### *MoCA*

The MoCA is an assessment tool for the rapid screening of cognitive dysfunction. It includes 11 items in 8 cognitive domains: attention and concentration, executive function, memory, language, abstract thinking, and computation.<sup>[19]</sup> The highest possible total score is 30, and a score of 26 or more is normal. It has a high sensitivity and a short test time, so it is suitable for clinical application.

### *BDI-II*

The BDI-II contains 21 topics, which are suitable for people older than 13 years old.

The areas of focus include symptoms of depression, such as despair, sensitivity, ways of understanding things, and physical characteristics, such as fatigue, weight loss, and decreased sexual ability.<sup>[20]</sup>

### *MMSE*

The MMSE scale includes the following seven aspects: time orientation, place orientation, immediate memory, attention and calculation, delayed memory, language, and visual space.<sup>[21]</sup> There are a total of 30 questions asked in the exam, with 1 point awarded for each correct answer, and 0 points given for each wrong answer or unanswered question. The total score range of the scale is 0–30 points. The test scores are closely related to the educational level of the subject. The normal cut-off values are as follows: illiterate subjects, >17; primary school education only, >20; junior high school education and above, >24.

### *Stroop task*

After a period of exercise intervention, comparison of the Stroop task response time between the open-chain, closed-chain, and control groups will be used to explore which types of exercise can improve cognitive inhibition ability<sup>[22]</sup>.

### *N-back task*

By comparing the n-back task accuracy of the elderly in the three groups, the improvement of the cognitive refresh ability of each group will be compared under different cognitive loads.<sup>[23]</sup>

### *Task-switch task*

1  
2  
3  
4 By comparing the task-switch accuracy of the three groups under different stimulus  
5  
6 conditions, we will determine which type of exercise can improve the cognitive  
7  
8 transformation ability most significantly.<sup>[24]</sup>  
9  
10

## 11 12 13 14 **Patient and public involvement**

15  
16  
17 Participants have not been involved in the study recruitment. The authors conceived  
18  
19 the initial research questions and outcome measures, and modified according to the  
20  
21 telephone interviews with patients and their guardians by a research assistant. In order  
22  
23 to assure the safety and feasibility of the intervention, we invited six elderly peoples  
24  
25 to learn and practise the table tennis and fit aerobics exercise before designing the  
26  
27 RCT. Table tennis and fit aerobics exercise were revised based on the exercise  
28  
29 performance and feedback provided by the participants. The burden of the  
30  
31 intervention will be assessed by patients and their advisors through face-to-face  
32  
33 interviews before signing informed consent. The findings of the study will be  
34  
35 disseminated to the participants and their guardians.  
36  
37  
38  
39  
40  
41  
42  
43  
44  
45

## 46 **Statistical analysis**

47  
48 The outcome assessor will be completed by the designated medical institution  
49  
50 (Shanghai Punan Hospital of Pudong New District, Shanghai, China), when the  
51  
52 participants go for the assessment, there will be no labels, so the outcome assessors  
53  
54 will be blind the group allocation. In order to ensure no inter-group differences in all  
55  
56 test indicators after random grouping, Independent-sample T test will be performed on  
57  
58  
59  
60



1  
2  
3  
4 each pretest data after random grouping. Repeated-measures analysis of variance will  
5  
6 be used to determine the effects of different types of exercise (open, closed, or  
7  
8 control) on the primary outcomes (GoRT, SRRT, SSD, and SSRT) as well as on the  
9  
10 secondary outcomes (MOCA score, BDI-II score, MMSE score, Stroop response  
11  
12 time, n-back accuracy, task-switch accuracy), with group and time serving as factors.  
13  
14  
15  
16  
17 Data will be analyzed by PhD students who are blind to group allocation.  
18  
19  
20  
21

## 22 **Discussion**

23  
24 Studies have found that elderly people who participate in ball and racket projects have  
25  
26 higher health and physical awareness.<sup>[25]</sup> Pilates exercises decreased depression and  
27  
28 improved the balance related to falling in elderly,<sup>[26]</sup> and also experienced significant  
29  
30 improvement in physical, social spiritual, and emotional wellness.<sup>[27]</sup> Korean scholars  
31  
32 found the cognitive/exercise dual-task program was an effective intervention for  
33  
34 improving cognitive function, health status, and life satisfaction, and for decreasing  
35  
36 depression of the elderly living in the community.<sup>[28]</sup>  
37  
38  
39  
40  
41  
42

43 Then some researchers found that athletes participating in open-chain exercises  
44  
45 have a faster switching speed, fewer cognitive resources, and a higher efficiency in  
46  
47 the inhibition process.<sup>[29]</sup> At the same time, another study has demonstrated that  
48  
49 athletes who engage in open-chain exercises have a stronger reaction switching  
50  
51 capability.<sup>[30]</sup> Based on previous research, participating in sports involving open-chain  
52  
53 exercises can improve the ability of inhibition, refresh, and conversion in the  
54  
55 inhibitory control process. In the Stoop task, when two different dimensions of a  
56  
57  
58  
59  
60

1  
2  
3  
4 stimulus interfere with each other, it is necessary for participants to inhibit the  
5  
6 interfering stimulus, it looked at the participants' ability to suppress interference. In  
7  
8 the n-back task, participants' attention capacity and memory capacity could be  
9  
10 examined during the process of stimulus updating. In task-switch task, participants  
11  
12 need to keep their attention focused when switching between different tasks, so it can  
13  
14 investigate the transformation ability of participants in the cognitive process.  
15  
16 Therefore, in this study, the Stroop task, n-back task, and task-switch task were  
17  
18 selected as secondary outcomes to investigate the inhibition, refresh, and  
19  
20 transformation abilities, respectively, of the participants. Determining the effect of  
21  
22 long-term intervention of different types of sports on the response inhibitory ability of  
23  
24 the elderly will improve our understanding of inhibitory control degradation and  
25  
26 support the development of diversified training programs.  
27  
28  
29  
30  
31  
32  
33

34  
35 This study will use the SST to explore how different types of exercise  
36  
37 experience affect the response inhibition ability in the elderly. Because of the  
38  
39 interactions of the cognitive level, depressive state, and mental state with the response  
40  
41 inhibitory ability, we will perform multiple MoCA, BDI-II, MMSE measurements  
42  
43 before and after each intervention. We will also explore whether sports involving  
44  
45 open-chain exercises can improve the cognitive level, depression state, and mental  
46  
47 state of the elderly while improving their inhibition and control ability. Through  
48  
49 multi-dimensional measurements of the participants, we hope to provide a more  
50  
51 sufficient theoretical basis for the mechanism of improving the inhibition and control  
52  
53 ability of the elderly through exercise.  
54  
55  
56  
57  
58  
59  
60

1  
2  
3  
4 This study will have several limitations. In this research, the screening  
5  
6 principles of the subjects will be determined in the longitudinal study, and the  
7  
8 inclusion criteria and exclusion criteria will be strictly defined, especially the  
9  
10 experimental groups and the control group in terms of age, physical level, intervention  
11  
12 time, and intensity. In addition, because the exercise that will serve as an intervention  
13  
14 will be widely known to the participants, the single-blind design may expose the study  
15  
16 to risks of bias stemming from performance and evaluation, which may potentially  
17  
18 lead to overestimation of the effects of exercise.  
19  
20  
21  
22  
23  
24  
25  
26

### 27 **Ethics and dissemination**

28  
29 All participants who meet the inclusion and exclusion criteria will be required to sign  
30  
31 an informed consent form prior to enrolling in the study. This study was approved by  
32  
33 the Shanghai University of Sport Research Ethics Committee (102772019RT012).  
34  
35 Study findings will be disseminated via publications in peer-reviewed journals and  
36  
37 presentations at international conferences.  
38  
39  
40  
41  
42  
43  
44  
45  
46  
47

48 **Funding:** This study was supported by grants from the National Natural  
49  
50 Science Foundation of China (3197070657) .  
51  
52  
53  
54

### 55 **Contributorship statement**

56  
57 Ke Liu: Conceptualization, Methodology, SoftwarePriya. Lanlan Zhang:Writing-  
58  
59  
60

1  
2  
3  
4 Reviewing and Editing. Jian Zhang: Visualization, Investigation. Jia-Ning Wei: Data  
5  
6 curation, Writing- Original draft preparation.  
7  
8  
9

## 10 11 12 **References**

- 
- 13  
14  
15 [1] Logan Gordon D, et al."On the ability to inhibit thought and action: general and special theories of an act of  
16 control.." *Psychological review* 121.1(2014): doi:10.1037/a0035230
- 17 [2] Darowski Emily S, et al."Age-related differences in cognition: the role of distraction control.." *Neuropsychology* 22.5(2008):. doi:10.1037/0894-4105.22.5.638.
- 18 [3] Chen T Y,et al."Cognitive Aging and Executive Decline Hypothesis." *Advances in Psychological*  
19 *Science* .05(2004):729-736. doi:CNKI:SUN:XLXD.0.2004-05-011.
- 20 [4] Fergus I.M. Craik, ,and Ellen Bialystok."Cognition through the lifespan: mechanisms of change." *Trends in*  
21 *Cognitive Sciences* 10.3(2006):. doi:10.1016/j.tics.2006.01.007.
- 22 [5]Timothy A. Salthouse."Aging and measures of processing speed." *Biological Psychology* 54.1(2000):.  
23 doi:10.1016/S0301-0511(00)00052-1.
- 24 [6] Zhang, N. N. , et al. "Effect of long-term Tai Chi exercise on cognitive function of middle-aged and old  
25 people." *Chinese Journal of Clinical Rehabilitation* 26(2006):7-9. doi:CNKI:SUN:XDKF.0.2006-26-004..
- 26 [7] Voss Michelle W., et al."Plasticity of Brain Networks in a Randomized Intervention Trial of Exercise Training  
27 in Older Adults." *Frontiers in Aging Neuroscience* .(2010):. doi:10.3389/FNAGI.2010.00032.
- 28 [8] Soul Cheon, et al."Acute Effects of Open Kinetic Chain Exercise Versus Those of Closed Kinetic Chain  
29 Exercise on Quadriceps Muscle Thickness in Healthy Adults." *International Journal of Environmental Research*  
30 *and Public Health* 17.13(2020): doi:10.3390/ijerph17134669.
- 31 [9] Michelle W. Voss, et al."Are expert athletes ‘expert’ in the cognitive laboratory? A meta - analytic review  
32 of cognition and sport expertise." *Applied Cognitive Psychology* 24.6(2010):. doi:10.1002/acp.1588.
- 33 [10] Chun-Hao Wang, et al."Open vs. Closed Skill Sports and the Modulation of Inhibitory Control." *PLOS ONE*  
34 8.2(2013):. doi:10.1371/journal.pone.0055773.
- 35 [11] Logan G D, et al."On the ability to inhibit simple and choice reaction time responses: a model and a method.." *Journal*  
36 *of experimental psychology. Human perception and performance* 10.2(1984):.  
37 doi:10.1037/0096-1523.10.2.276.
- 38 [12] Janette L. Smith, et al."Motor and non-motor inhibition in the Go/NoGo task: An ERP and fMRI study." *International Journal of Psychophysiology* 87.3(2013):. doi:10.1016/j.ijpsycho.2012.07.185.
- 39 [13] Frederick Verbruggen, ,and Gordon D. Logan."Response inhibition in the stop-signal paradigm." *Trends in*  
40 *Cognitive Sciences* 12.11(2008):. doi:10.1016/j.tics.2008.07.005.
- 41 [14] Verbruggen Frederick, Chambers Christopher D.,and Logan Gordon D.."Fictitious Inhibitory Differences:  
42 How Skewness and Slowing Distort the Estimation of Stopping Latencies." *Psychological Science* 24.3(2013):.  
43 doi10.1177/0956797612457390:.
- 44 [15] Frederick Verbruggen, et al."A consensus guide to capturing the ability to inhibit actions and impulsive  
45 behaviors in the stop-signal task." *eLife* 8.(2019):. doi:10.7554/eLife.46323.
- 46 [16] Friehs Maximilian A.,and Frings Christian."Pimping inhibition: Anodal tDCS enhances stop-signal reaction  
47 time.." *Journal of Experimental Psychology: Human Perception and Performance* 44.12(2018):.  
48 doi:10.1037/XHP0000579.
- 49 [17]Maximilian A. Friehs, ,and Christian Frings."Cathodal tDCS increases stop-signal reaction time." *Cognitive,*  
50 *Affective, & Behavioral Neuroscience* 19.5(2019):. doi:10.3758/s13415-019-00740-0.
- 51  
52  
53  
54  
55  
56  
57  
58  
59  
60

- 1  
2  
3  
4  
5 [18] Faul, F., Erdfelder, E., Lang, A.-G., Buchner, A., 2007. G\*Power 3.1 manual. *Behav. Res. Methods* 39 (2),  
6 175–191.
- 7 [19] Gao, F. The application of moca test and DTI in mild cognitive impairment. Diss. 2008. *PLA Military Medical*  
8 *Training College*, MA thesis.
- 9 [20] F. Holländare, G. Andersson, and I Engström. "A Comparison of Psychometric Properties Between Internet  
10 and Paper Versions of Two Depression Instruments (BDI-II and MADRS-S) Administered to Clinic Patients."  
11 *Journal of Medical Internet Research* 12.5(2010):76-79.
- 12 [21] SMD Azmeh, et al. *Mini-Mental State Examination (MMSE)*. Springer New York, 2011.
- 13 [22] Chen, Ji, et al. "The Latest advances of the Stroop Effect-its theory, paradigms, affecting factors." *Journal of*  
14 *Psychological Science*. 02(2007):415-418+390. doi:10.16719/j.cnki.1671-6981.2007.02.042.
- 15 [23] Song, HK. "The evolution and application of N-back paradigm." *Journal of Southwest University (Social*  
16 *Sciences Edition)* 37.S1(2011):81-82. doi:10.13718/j.cnki.xdsk.2011.s1.065.
- 17 [24] Shi, Y., and X. Zhou. "Task Switching, A Paradigm in the Study of Executive Control." *Advances in*  
18 *Psychological Science*. 05(2004):672-679. doi:CNKI:SUN:XLXD.0.2004-05-004.
- 19 [25] Ahn, C., & Lee, W. (2021). The Difference between exercise effect, health and fitness perception according to  
20 the degree of exercise participation of the elderly. *Journal of adapted physical activity and exercise*, 29(2),  
21 245-254.
- 22 [26] Mahyar Mokhtari, et al. "The Effect of 12-Week Pilates Exercises on Depression and Balance Associated with  
23 Falling in the Elderly." *Procedia - Social and Behavioral Sciences* 70.(2013): doi:10.1016/j.sbspro.2013.01.246.
- 24 [27] Roh Su Yeon. "The effect of 12-week Pilates exercises on wellness in the elderly.." *Journal of exercise*  
25 *rehabilitation* 12.2(2016): doi:10.12965/jer.1632590.295.
- 26 [28] Mahyar Mokhtari, et al. "The Effect of 12-Week Pilates Exercises on Depression and Balance Associated  
27 with Falling in the Elderly." *Procedia - Social and Behavioral Sciences* 70.(2013):  
28 doi:10.1016/j.sbspro.2013.01.246.
- 29 [29] Di Russo Francesco, et al. "Benefits of sports participation for executive function in disabled athletes.." *Journal*  
30 *of neurotrauma* 27.12(2010):. doi:10.1089/neu.2010.1501.
- 31 [30] Bjoern Krenn, et al. "Sport type determines differences in executive functions in elite athletes." *Psychology of*  
32 *Sport & Exercise* 38.(2018):. doi:10.1016/j.psychsport.2018.06.002.
- 33  
34  
35  
36  
37  
38  
39  
40  
41  
42  
43  
44  
45  
46  
47  
48  
49  
50  
51  
52  
53  
54  
55  
56  
57  
58  
59  
60

1  
2  
3  
4  
5  
6  
7  
8  
9  
10  
11  
12  
13  
14  
15  
16  
17  
18  
19  
20  
21  
22  
23  
24  
25  
26  
27  
28  
29  
30  
31  
32  
33  
34  
35  
36  
37  
38  
39  
40  
41  
42  
43  
44  
45  
46  
47  
48  
49  
50  
51  
52  
53  
54  
55  
56  
57  
58  
59  
60



Figure 1 Flow diagram of the study design

90x90mm (300 x 300 DPI)



Figure 2. Stop signal task flow chart

90x90mm (300 x 300 DPI)

1  
2  
3  
4  
5  
6  
7  
8  
9  
10  
11  
12  
13  
14  
15  
16  
17  
18  
19  
20  
21  
22  
23  
24  
25  
26  
27  
28  
29  
30  
31  
32  
33  
34  
35  
36  
37  
38  
39  
40  
41  
42  
43  
44  
45  
46  
47  
48  
49  
50  
51  
52  
53  
54  
55  
56  
57  
58  
59  
60



Figure 3. Stop behavioral task

The task will consist of randomly interspersed no-go and stop-signal trials. A total of 480 trials will be performed (75% go, 25% stop).

90x90mm (300 x 300 DPI)



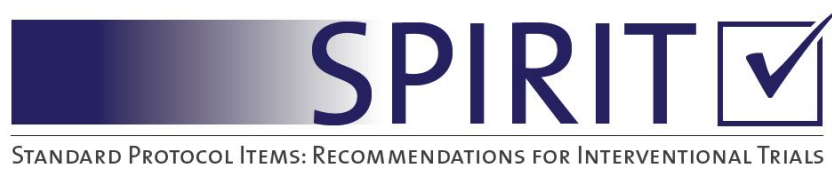

SPIRIT 2013 Checklist: Recommended items to address in a clinical trial protocol and related documents\*

| Section/item                      | Item No | Description                                                                                                                                                                                                                                                                                                                                                                                                                                                                                                                                                                                        |
|-----------------------------------|---------|----------------------------------------------------------------------------------------------------------------------------------------------------------------------------------------------------------------------------------------------------------------------------------------------------------------------------------------------------------------------------------------------------------------------------------------------------------------------------------------------------------------------------------------------------------------------------------------------------|
| <b>Administrative information</b> |         |                                                                                                                                                                                                                                                                                                                                                                                                                                                                                                                                                                                                    |
| Title                             | 1       | Comparison of open- and closed-chain exercises in improving the response inhibitory ability of the elderly: a protocol for a randomized controlled clinical trial (page 8,line 4)                                                                                                                                                                                                                                                                                                                                                                                                                  |
| Trial registration                | 2a      | This study has been registered prospectively in the Chinese Clinical Trial Registry (ChiCTR2100043616, 23 February 2021). (page 9,line 17)                                                                                                                                                                                                                                                                                                                                                                                                                                                         |
|                                   | 2b      |                                                                                                                                                                                                                                                                                                                                                                                                                                                                                                                                                                                                    |
| Protocol version                  | 3       | The study is scheduled to begin in August 2021 and continue until August 2023. (page 12,line 40)                                                                                                                                                                                                                                                                                                                                                                                                                                                                                                   |
| Funding                           | 4       | This study was supported by grants from the National Natural Science Foundation of China (3197070657) . (page 26,line 22)                                                                                                                                                                                                                                                                                                                                                                                                                                                                          |
| Roles and responsibilities        | 5a      | Ke Liu; Shanghai Punan Hospital of Pudong New District, Shanghai, China; Conceptualization, Methodology, SoftwarePriya. (page 26,line 30)                                                                                                                                                                                                                                                                                                                                                                                                                                                          |
|                                   | 5b      |                                                                                                                                                                                                                                                                                                                                                                                                                                                                                                                                                                                                    |
|                                   | 5c      |                                                                                                                                                                                                                                                                                                                                                                                                                                                                                                                                                                                                    |
|                                   | 5d      | Lan-Lan Zhang: Writing- Reviewing and Editing. Jian Zhang: Visualization, Investigation. Jia-Ning Wei: Data curation, Writing- Original draft preparation. (page 26,line 30)                                                                                                                                                                                                                                                                                                                                                                                                                       |
| <b>Introduction</b>               |         |                                                                                                                                                                                                                                                                                                                                                                                                                                                                                                                                                                                                    |
| Background and rationale          | 6a      | As people age, they are more likely to experience a decline in their response inhibition ability, which interferes with daily life. Previous studies have shown that exercise intervention can improve the cognitive ability of the elderly, but research on open- and closed-chain exercises to improve the response inhibition in this age group is still limited. This study will explore the advantages of long-term intervention of table tennis (open-chain exercise) compared with fit aerobics (closed-chain exercise) on the response inhibitory ability of the elderly. (page 8,line 17) |

1  
2  
3  
4  
5  
6  
7  
8  
9  
10  
11  
12  
13  
14  
15  
16  
17  
18  
19  
20  
21  
22  
23  
24  
25  
26  
27  
28  
29  
30  
31  
32  
33  
34  
35  
36  
37  
38  
39  
40  
41  
42  
43  
44  
45  
46  
47  
48  
49  
50  
51  
52  
53  
54  
55  
56  
57  
58  
59  
60

- 6b The elderly who choose not to exercise as the control group can compare the effects of exercise intervention with the intervention group. (page 15,line 21)
- Objectives 7 We hypothesized that different types of exercise intervention can affect the response inhibitory ability to varying degrees and that the effect of open-chain exercises is better. (page 11,line 58)
- Trial design 8 This study protocol of a pilot study is designed as a prospective, single-blind randomized controlled trial. Eligible participants will be randomized into table tennis, fit aerobics, or control groups at a 1:1:1 ratio. The duration of exercise intervention will be 6 months. The cognitive function test (questionnaire and behavioral task) will be conducted before the intervention as well as at 3 months, 6 months, and 12 months after the intervention. Participants who meet the criteria will undergo baseline assessments. All evaluations will be done at baseline and immediately after the exercise intervention. (page 12,line 17)

### Methods: Participants, interventions, and outcomes

- Study setting 9 School of Psychology, Shanghai University of Sport, Shanghai, China (page 15,line 21)
- Eligibility criteria 10 Any participants with heart disease, neurological disorder, musculoskeletal disorders, and other conditions not suitable for physical activity, contraindications to fMRI or TMS will be excluded. In addition, those with a regular exercise routine will be excluded. All participants will be between the ages of 60 and 70 years old and right-handed as assessed by the Edinburgh Handedness Inventory. Moreover, they must have their own residence. (page 12,line 53)
- Interventions 11a Table 2 Exercise intervention TIDieR (page 15,line 20)
- 11b Table 2 Exercise intervention TIDieR (page 15,line 20)
- 11c Table 2 Exercise intervention TIDieR (page 15,line 20)
- 11d Table 2 Exercise intervention TIDieR (page 15,line 20)

|                                                                                     |                      |    |                                                                                                                                                                                                                                                                                                                                                                                                                                                                                                                                                                                                                                                                                                                                                                                              |
|-------------------------------------------------------------------------------------|----------------------|----|----------------------------------------------------------------------------------------------------------------------------------------------------------------------------------------------------------------------------------------------------------------------------------------------------------------------------------------------------------------------------------------------------------------------------------------------------------------------------------------------------------------------------------------------------------------------------------------------------------------------------------------------------------------------------------------------------------------------------------------------------------------------------------------------|
| 1<br>2<br>3<br>4<br>5<br>6<br>7<br>8<br>9<br>10<br>11<br>12<br>13<br>14<br>15<br>16 | Outcomes             | 12 | Primary outcome : Behavioral task (RT,ACC) Secondary outcome measures will include the following: (1) Montreal Cognitive Assessment (MoCA); (2) BDI-II; (3) MMSE; (4) Stroop task testing; (5) n-back task testing; and (6) task-switch task testing (Table 3). The process of inhibitory control is the process of inhibition, refresh, and switching of the response task through cognitive function, so we will test the abilities of inhibition, refresh, and switching in the cognitive process of the elderly with different exercise types before and after the intervention by the Stroop task, the n-back task, and the task-switch task to compare their response inhibitory ability. The details of each outcome and instrument will be compiled as in Table 3. (page 19,line 45) |
| 17<br>18<br>19<br>20<br>21<br>22<br>23<br>24<br>25<br>26<br>27<br>28<br>29          | Participant timeline | 13 | This study protocol of a pilot study is designed as a prospective, single-blind randomized controlled trial. Eligible participants will be randomized into table tennis, fit aerobics, or control groups at a 1:1:1 ratio. The duration of exercise intervention will be 6 months. The cognitive function test (questionnaire and behavioral task) will be conducted before the intervention as well as at 3 months, 6 months, and 12 months after the intervention. Participants who meet the criteria will undergo baseline assessments. All evaluations will be done at baseline and immediately after the exercise intervention (See Figure 1). (page 12,line 17)                                                                                                                        |
| 30<br>31<br>32<br>33<br>34<br>35<br>36<br>37<br>38<br>39                            | Sample size          | 14 | From our previous studies on the modulation of SST performance,we expected an effect of $r = 0.4$ . Together with an $\alpha$ -value of 0.05 and a power of $1 - \beta = 0.9$ , a sample of at least 72 participants (24/group) was planned to find a similar effect. Calculations were carried out using G*Power, version 3.1, with anticipation of a 20% attrition rate. Therefore, we plan to recruit 90 subjects (30/group). (page 14,line 13)                                                                                                                                                                                                                                                                                                                                           |
| 40<br>41<br>42<br>43<br>44                                                          | Recruitment          | 15 | All participants were recruited and counted through the School of Psychology, Shanghai Sport University, and intervened in Shanghai Sport University. (page 15,line 20)                                                                                                                                                                                                                                                                                                                                                                                                                                                                                                                                                                                                                      |

#### **Methods: Assignment of interventions (for controlled trials)**

##### Allocation:

|                                                                            |                     |     |                                                                                                                                                                                                                                                                                                                                                                                                                                                    |
|----------------------------------------------------------------------------|---------------------|-----|----------------------------------------------------------------------------------------------------------------------------------------------------------------------------------------------------------------------------------------------------------------------------------------------------------------------------------------------------------------------------------------------------------------------------------------------------|
| 48<br>49<br>50<br>51<br>52<br>53<br>54<br>55<br>56<br>57<br>58<br>59<br>60 | Sequence generation | 16a | Eligible participants will be randomized into table tennis, fit aerobics, or control groups at a 1:1:1 ratio after consenting and baseline assessment.I will use The Excel software to code the subjects in 1-90 according to the recruitment time, and then use the formula '=RAND()' to generate the corresponding random sequence. By sorting the random sequence and then grouping it, 90 subjects will be randomly grouped. (page 14,line 29) |
|----------------------------------------------------------------------------|---------------------|-----|----------------------------------------------------------------------------------------------------------------------------------------------------------------------------------------------------------------------------------------------------------------------------------------------------------------------------------------------------------------------------------------------------------------------------------------------------|

|    |                |     |                                                                           |
|----|----------------|-----|---------------------------------------------------------------------------|
| 1  |                |     |                                                                           |
| 2  | Allocation     | 16b | Eligible participants will be randomized into table tennis, fit aerobics, |
| 3  | concealment    |     | or control groups at a 1:1:1 ratio after consenting and baseline          |
| 4  | mechanism      |     | assessment. I will use The Excel software to code the subjects in 1-90    |
| 5  |                |     | according to the recruitment time, and then use the formula '=RAND()'     |
| 6  |                |     | to generate the corresponding random sequence. By sorting the             |
| 7  |                |     | random sequence and then grouping it, 90 subjects will be randomly        |
| 8  |                |     | grouped. (page 14, line 29)                                               |
| 9  |                |     |                                                                           |
| 10 |                |     |                                                                           |
| 11 | Implementation | 16c | Ke Liu will generate the allocation sequence, Jian Zhang will enrol       |
| 12 |                |     | participants, and Jian Zhang will assign participants to interventions.   |
| 13 |                |     |                                                                           |
| 14 | Blinding       | 17a | The data is analyzed by specialized PhD students, they analyse the        |
| 15 | (masking)      |     | data be blind to group allocation. (page 23, line 48)                     |
| 16 |                |     |                                                                           |
| 17 |                | 17b | After the results are processed, the grouping can be announced.           |
| 18 |                |     |                                                                           |
| 19 |                |     |                                                                           |

### Methods: Data collection, management, and analysis

|    |                 |     |                                                                            |
|----|-----------------|-----|----------------------------------------------------------------------------|
| 20 |                 |     |                                                                            |
| 21 | Data collection | 18a | In order to ensure no inter-group differences in all test indicators after |
| 22 | methods         |     | random grouping, Independent-sample T test will be performed on            |
| 23 |                 |     | each pretest data after random grouping. Repeated-measures                 |
| 24 |                 |     | analysis of variance will be used to determine the effects of different    |
| 25 |                 |     | types of exercise (open, closed, or control) on the primary outcomes       |
| 26 |                 |     | (GoRT, SRRT, SSD, and SSRT) as well as on the secondary                    |
| 27 |                 |     | outcomes (MOCA score, BDI-II score, MMSE score, Stroop response            |
| 28 |                 |     | time, n-back accuracy, task-switch accuracy), with group and time          |
| 29 |                 |     | serving as factors. (page 23, line 32)                                     |
| 30 |                 |     |                                                                            |
| 31 |                 | 18b | Feedback will be given to each participant on a regular basis,             |
| 32 |                 |     | including their physical and psychological data, as well as their motor    |
| 33 |                 |     | skills learning performance. Keep them up to date on their progress        |
| 34 |                 |     | and status to keep them engaged. (page 17, line 17)                        |
| 35 |                 |     |                                                                            |
| 36 |                 |     |                                                                            |
| 37 |                 |     |                                                                            |
| 38 |                 |     |                                                                            |
| 39 | Data            | 19  | The data is analyzed by specialized PhD students. (page 23, line           |
| 40 | management      |     | 48)                                                                        |
| 41 |                 |     |                                                                            |
| 42 | Statistical     | 20a | Repeated-measures analysis of variance will be used to determine the       |
| 43 | methods         |     | effects of different types of exercise (open, closed, or control) on the   |
| 44 |                 |     | primary outcomes (GoRT, SRRT, SSD, and SSRT) as well as on the             |
| 45 |                 |     | secondary outcomes (MOCA score, BDI-II score, MMSE score,                  |
| 46 |                 |     | Stroop response time, n-back accuracy, task-switch accuracy), with         |
| 47 |                 |     | group and time serving as factors. (page 23, line 38)                      |
| 48 |                 |     |                                                                            |
| 49 |                 | 20b | No                                                                         |
| 50 |                 |     |                                                                            |
| 51 |                 | 20c | The data is analyzed by specialized PhD students, they analyse the         |
| 52 |                 |     | data be blind to group allocation. (page 23, line 48)                      |
| 53 |                 |     |                                                                            |
| 54 |                 |     |                                                                            |
| 55 |                 |     |                                                                            |

### Methods: Monitoring

|    |                 |     |                                                                    |
|----|-----------------|-----|--------------------------------------------------------------------|
| 56 |                 |     |                                                                    |
| 57 | Data monitoring | 21a | The data is analyzed by specialized PhD students, they analyse the |
| 58 |                 |     | data be blind to group allocation. (page 23, line 48)              |
| 59 |                 |     |                                                                    |
| 60 |                 |     |                                                                    |

|          |     |                                                                                                                                               |
|----------|-----|-----------------------------------------------------------------------------------------------------------------------------------------------|
|          | 21b | The initiator of the experiment, Professor Zhang will have access to these interim results and make the final decision to terminate the trial |
| Harms    | 22  | In the Participants gave an informed consent form.                                                                                            |
| Auditing | 23  | In the Participants gave an informed consent form.                                                                                            |

### Ethics and dissemination

|                               |     |                                                                                                                                                                                                                                                                        |
|-------------------------------|-----|------------------------------------------------------------------------------------------------------------------------------------------------------------------------------------------------------------------------------------------------------------------------|
| Research ethics approval      | 24  | This study was approved by the Shanghai University of Sport Research Ethics Committee (102772019RT012). (page 8,line 59)                                                                                                                                               |
| Protocol amendments           | 25  | Upload as attachment.                                                                                                                                                                                                                                                  |
| Consent or assent             | 26a | PhD students in charge of data collection will collect data within the cognitive function test (questionnaire and behavioral task) will be conducted before the intervention as well as at 3 months, 6 months, and 12 months after the intervention. (page 12,line 24) |
|                               | 26b | No                                                                                                                                                                                                                                                                     |
| Confidentiality               | 27  | Professor Zhang, who is in charge of recruitment, completes the participant information management.                                                                                                                                                                    |
| Declaration of interests      | 28  | The authors have no conflicts of interest to declare.                                                                                                                                                                                                                  |
| Access to data                | 29  | The result will be made public by the person in charge of the National Natural Science Foundation of China (3197070657)                                                                                                                                                |
| Ancillary and post-trial care | 30  | In the Participants gave an informed consent form.                                                                                                                                                                                                                     |
| Dissemination policy          | 31a | This study has been registered prospectively in the Chinese Clinical Trial Registry (ChiCTR2100043616, 23 February 2021).It will be published in accordance with the standards of the Chinese Clinical Trial Registry.                                                 |
|                               | 31b | It will be written in accordance with the standards of the Chinese Clinical Trial Registry.                                                                                                                                                                            |
|                               | 31c | It can be viewed in the Chinese Clinical Trial Registry.                                                                                                                                                                                                               |

### Appendices

|                            |    |                       |
|----------------------------|----|-----------------------|
| Informed consent materials | 32 | Upload as attachment. |
| Biological specimens       | 33 | No.                   |

---

\*It is strongly recommended that this checklist be read in conjunction with the SPIRIT 2013 Explanation & Elaboration for important clarification on the items. Amendments to the protocol should be tracked and dated. The SPIRIT checklist is copyrighted by the SPIRIT

1  
2  
3  
4  
5  
6  
7  
8  
9  
10  
11  
12  
13  
14  
15  
16  
17  
18  
19  
20  
21  
22  
23  
24  
25  
26  
27  
28  
29  
30  
31  
32  
33  
34  
35  
36  
37  
38  
39  
40  
41  
42  
43  
44  
45  
46  
47  
48  
49  
50  
51  
52  
53  
54  
55  
56  
57  
58  
59  
60

Group under the Creative Commons "[Attribution-NonCommercial-NoDerivs 3.0 Unported](#)" license.

For peer review only
